1 **Title:** Landscape change and alien invasions drive shifts in native lady beetle communities over a century

2

3 Kayla I Perry <sup>1,2</sup>, Christie A Bahlai <sup>2</sup>, Timothy J Assal <sup>3</sup>, Christopher B Riley <sup>1,4</sup>, Katherine J Turo <sup>1,5</sup>, Leo

4 Taylor <sup>1,6</sup>, James Radl <sup>1</sup>, Yvan A Delgado de la flor <sup>1,7</sup>, Frances S Sivakoff <sup>8</sup>, Mary M Gardiner <sup>1</sup>

5

6 <sup>1</sup> Department of Entomology, The Ohio State University, 2021 Coffey Road, Columbus, Ohio 43210,

7 USA

8 <sup>2</sup> Department of Biological Sciences, Kent State University, 800 E. Summit Street, Kent, Ohio 44242

9 USA

10 <sup>3</sup> Department of Geography, Kent State University, 325 S Lincoln Street, Kent, Ohio 44242, USA

11 <sup>4</sup> Current Address: Bartlett Tree Research Laboratories, 13768 Hamilton Road, Charlotte, North Carolina

12 28278, USA

13 <sup>5</sup> Current Address: Department of Ecology, Evolution, and Natural Resources, Rutgers University, 14

14 College Farm Road, New Brunswick, New Jersey 08901, USA

15 <sup>6</sup> Current Address: The Office of Diversity, Equity, and Inclusion, The Ohio State University, 2120 Fyffe

16 Road, Columbus, Ohio 43210, USA

17 <sup>7</sup> Current Address: Air Program, Environmental Monitoring Branch, California Department of Pesticide

18 Regulation, 1001 I Street, Sacramento, California 95814, USA

19 <sup>8</sup> Department of Evolution, Ecology and Organismal Biology, The Ohio State University, 1465 Mount

20 Vernon Avenue, Marion, Ohio 43302, USA

21

22 \*Corresponding Author: Kayla I Perry, [kperry34@kent.edu](mailto:kperry34@kent.edu)

23

24 **Abstract**

25 **Aim:** Understanding drivers of insect population declines is essential for the development of successful  
26 conservation plans, but data limitations restrict assessment across spatial and temporal scales. Museum  
27 records represent a unique source of historical data that can be leveraged to investigate temporal trends in  
28 insect communities. Native lady beetle decline has been attributed to competition with established alien  
29 species and landscape change, but the relative importance of these drivers is difficult to measure with  
30 short-term field-based studies. Here we assessed distribution patterns for native lady beetle species over  
31 12 decades using museum records and evaluated the relative importance of alien species and landscape  
32 change as long-term drivers contributing to changes in lady beetle communities.

33 **Location:** Ohio, USA.

34 **Methods:** We compiled occurrence records for 28 lady beetle species collected in Ohio, USA from 1900-  
35 2018. Incidence-based measures of taxonomic beta-diversity were used to evaluate changes in lady beetle  
36 community composition over time. To evaluate the relative influence of temporal, spatial, landscape, and  
37 community drivers on the captures of native lady beetles, we constructed negative binomial generalized  
38 additive models.

39 **Results:** We report evidence of declines in captures for several native species, including *Adalia*  
40 *bipunctata*, *Coccinella novemnotata*, *Hippodamia convergens*, and *Coleomegilla maculata*.

41 Importantly, the timing, severity, and drivers of these documented declines were species-specific.  
42 Changes in lady beetle species composition began in the 1980s, when processes of species loss/gain and  
43 turnover shifted communities towards dominance by a few alien lady beetle species. Land cover change  
44 also was associated with declines in captures, particularly for *C. novemnotata* which declined prior to the  
45 arrival of alien species in the state.

46 **Main conclusions:** Our study documented shifts in Ohio's lady beetle communities beginning in the  
47 1980s as alien species supplanted natives. Drivers of declines in captures of native lady beetle species  
48 were highly species-specific, emphasizing that mechanisms driving population losses cannot be

49 generalized even among closely related species. These findings also indicate the importance of museum  
50 holdings and the analysis of species-level data when studying temporal trends in insect populations.

51

52 **Keywords:** Coccinellidae, Invasive, exotic, non-native, ladybird, land use, land cover, species decline

53

## 54 **Introduction**

55 Global biodiversity loss is a growing threat to the ecosystem function and services for which  
56 humans depend (Dirzo & Raven, 2003; Mace *et al.*, 2012; Ceballos *et al.*, 2015; Cardoso *et al.*, 2020).  
57 Given the importance of insects for ecosystem services such as pollination, pest suppression, and nutrient  
58 cycling (Losey & Vaughan, 2006; Yang & Gratton, 2014), understanding the causes of documented  
59 spatiotemporal changes in insect populations is a critical research focus. Numerous recent studies have  
60 pointed to declines in the abundance, richness, and biomass of insects (Hallmann *et al.*, 2017; Seibold *et*  
61 *al.*, 2019), including bees (Grixti *et al.*, 2009; Potts *et al.*, 2010), beetles (Brooks *et al.*, 2012; Homburg *et*  
62 *al.*, 2019), leafhoppers and planthoppers (Schuch *et al.*, 2012), and butterflies and moths (Maes & Van  
63 Dyck, 2001; Conrad *et al.*, 2006; Habel *et al.*, 2016; Warren *et al.*, 2021). Although population declines  
64 have been frequently reported, relatively stable or increasing populations of insects also have been  
65 documented in some settings (Shortall *et al.*, 2009; Fox *et al.*, 2014; Crossley *et al.*, 2020; Schowalter *et*  
66 *al.*, 2021). For example, observations of moths in Great Britain identified highly species-specific temporal  
67 patterns over a 40 year period, as 260 species declined in frequency, 160 species increased, and 253  
68 species remained unchanged (Fox *et al.*, 2014). Complexity in the responses of insects has generated  
69 scientific debate about whether observed declines are generalizable across insect taxa and guilds and at  
70 larger spatial scales (Simmons *et al.*, 2019; Thomas *et al.*, 2019; Didham *et al.*, 2020; Saunders *et al.*,  
71 2020). Although many challenges to studying insect population trends exist (Didham *et al.*, 2020;  
72 Montgomery *et al.*, 2020), understanding the magnitude and drivers of declines in insect species is critical  
73 for biodiversity conservation management and the maintenance of insect-based ecosystem services and  
74 function.

75           One primary limitation to understanding insect populations over time stem from data deficiencies  
76 such as low taxonomic resolution, geographic restrictions, and short time series (Sánchez-Bayo &  
77 Wyckhuys, 2019; Thomas *et al.*, 2019; Didham *et al.*, 2020). However, specimen records from natural  
78 history museums and other institutions can be leveraged to investigate trends in insect populations over  
79 greater spatial and temporal scales (Lister, 2011; Kharouba *et al.*, 2019). Although specimen record-based  
80 data have their own set of biases and challenges (Boakes *et al.*, 2010; Meineke & Daru, 2021), biological  
81 collections represent a unique source of historical data that documents the occurrence of species in time  
82 and space. For example, museum records revealed that 11 bumble bee species native to eastern North  
83 America and Canada have experienced substantial (>50%) declines in captures over the past century,  
84 while eight species have remained stable or increased in collections (Colla *et al.*, 2012). Importantly,  
85 specimen records can be used as baseline measures for investigating the impacts of anthropogenic drivers  
86 such as the establishment of exotic species, environmental degradation, and climate change on patterns of  
87 biodiversity (Suarez & Tsutsui, 2004; Winker, 2004; Johnson *et al.*, 2011; Kharouba *et al.*, 2019). For  
88 instance, moth assemblages collected on Mount Kinabalu in Borneo in 2007 were compared to historical  
89 records collected from the same sites in 1965, revealing upward shifts in the altitudinal distribution of  
90 species in response to changes in temperature (Chen *et al.*, 2009). Although the use of collections data is  
91 limited in its ability to track the absolute abundance of a species due to sampling effort variation (Ries *et*  
92 *al.*, 2019), historical specimen data facilitate understanding of species' responses to anthropogenic change  
93 by helping to distinguish signals of decline from natural population variability, especially when  
94 considering relative observations in groups of similar taxa. Therefore, specimen records are invaluable  
95 resources that can be harnessed to address biodiversity conservation initiatives, including documenting  
96 changes in communities of beneficial insects.

97           Lady beetles (Coleoptera: Coccinellidae) are a family of charismatic insect species that are  
98 commonly collected and contribute broadly to pest suppression by consuming aphids, scales, psyllids,  
99 mites, fungi, and other pests (Evans, 2009; Hodek & Honěk, 2009; Weber & Lundgren, 2009; Hodek *et*  
100 *al.*, 2012). Because lady beetles are capable of rapidly colonizing habitats to exploit ephemeral prey

101 resources, these species have been used widely in biological control programs in agricultural systems  
102 (Caltagirone & Doult, 1989; Obrycki & Kring, 1998; Koch, 2003; Rondoni *et al.*, 2021). A number of  
103 authors have noted declines in native lady beetle populations across the United States (Alyokhin &  
104 Sewell, 2004; Harmon *et al.*, 2007) and Europe (Roy *et al.*, 2012; Brown & Roy, 2018), which may  
105 contribute to an overall loss of resilience of the biological control services offered by this community  
106 (Bahlai *et al.*, 2021). For example, the historically widespread native aphidophagous species *Hippodamia*  
107 *convergens* Guerin has declined in the US states of Michigan (Gardiner *et al.*, 2009), Ohio (Gardiner *et*  
108 *al.*, 2012), Wisconsin (Steffens and Lumen 2015), and Minnesota (Steffens and Lumen 2015), as well as  
109 the Canadian Province of Manitoba (Turnock *et al.* 2003). Likewise, the nine-spotted lady beetle  
110 *Coccinella novemnotata* Herbst was once common in eastern North America but had not been collected  
111 for over a decade until a community scientist “rediscovered” it (Losey *et al.*, 2007). Anthropogenic  
112 activities such as the establishment of alien species and landscape change have been hypothesized as  
113 potential drivers of native lady beetle decline (Alyokhin & Sewell, 2004; Harmon *et al.*, 2007; Gardiner *et*  
114 *al.*, 2012; Honek *et al.*, 2014; Bahlai *et al.*, 2015; Roy *et al.*, 2016).

115         Several studies have observed that the decline of native aphidophagous species coincided with the  
116 establishment and spread of alien lady beetle species, particularly the Asian species *Harmonia axyridis*  
117 (Pallas) and the European species *Coccinella septempunctata* (Linnaeus) (Turnock *et al.*, 2003; Roy *et al.*,  
118 2012; Steffens & Lumen, 2015; Roy *et al.*, 2016). Following their establishment, alien lady beetles  
119 became the dominant species within many native communities (Alyokhin & Sewell, 2004; Harmon *et al.*,  
120 2007; Bahlai *et al.*, 2015). Because of their dominance, direct and indirect competitive interactions with  
121 alien species are hypothesized as a driver of declines in native lady beetles (Pell *et al.*, 2008; Li *et al.*,  
122 2021). For example, intraguild predation has been documented among native and alien lady beetles in the  
123 field (Gagnon *et al.*, 2011; Thomas *et al.*, 2013; Brown *et al.*, 2015; Ortiz-Martínez *et al.*, 2020), wherein  
124 native eggs and larvae were more likely to be the intraguild prey for alien species (Snyder *et al.*, 2004;  
125 Katsanis *et al.*, 2013). Apparent competition also has been observed in the field, as native species  
126 experienced greater egg predation from a guild of shared predators than alien lady beetle species (Smith

127 & Gardiner, 2013). These asymmetric interactions may largely benefit alien species at the expense of  
128 native lady beetle populations, but the extent and context of these effects on native species are difficult to  
129 quantify. The short time scales of many studies and the lack of data from lady beetle communities before  
130 the establishment of alien species limits understanding of the impacts of these invaders.

131 Landscape change that results in the loss, fragmentation, and degradation of natural habitat also  
132 has been hypothesized as a key driver contributing to population declines of insect species (Potts, *et al.*  
133 2010; Wagner, 2020; Wagner *et al.*, 2021), including lady beetles (Honek *et al.*, 2017). Land cover  
134 change resulting from increased urbanization and agricultural intensification can influence the structure  
135 and composition of lady beetle communities (Gardiner *et al.*, 2009; Woltz & Landis, 2014; Grez *et al.*,  
136 2019; Parker *et al.*, 2020). For example, native and alien species were less abundant in isolated urban  
137 greenspaces that were embedded in landscapes dominated by impervious surfaces and built infrastructure  
138 (Parker *et al.*, 2020). In agricultural landscapes, native and alien lady beetles were more abundant in fields  
139 surrounded by higher crop diversity and more semi-natural habitat types such as grasslands and forests  
140 (Woltz & Landis, 2014). Loss and fragmentation of natural habitat in landscapes such as those dominated  
141 by urban and agricultural land cover may differentially affect species depending on their life history traits  
142 such as phenology, dispersal ability, overwintering biology, and food requirements (Zaviezo *et al.*, 2006).  
143 However, the impacts of landscape change on native lady beetle populations may occur gradually over  
144 time, making species responses difficult to detect over short time scales. For example, gradual directional  
145 change in the species composition of native lady beetle communities was documented over a 118-year  
146 period in Missouri, USA using museum specimen records (Diepenbrock *et al.*, 2016). Because there was  
147 no evidence that the establishment of alien lady beetle species affected the rate of change, Diepenbrock *et*  
148 *al.* (2016) hypothesized that these long-term community changes may be related to altered land use  
149 patterns. The substantial year to year variation in the abundance of lady beetle species (Elliott *et al.*, 1996;  
150 Honek *et al.*, 2014) requires longer time series data to detect changes in populations caused by landscape  
151 change and to distinguish these effects from other anthropogenic stressors (Bahlai & Zipkin, 2020; Bahlai  
152 *et al.*, 2021).

153           While several hypotheses have been proposed, the causes of declines in native lady beetle  
154 populations remain under debate. Importantly, these hypotheses are not mutually exclusive, and it is  
155 likely that causes of declines in native species are multi-faceted wherein multiple mechanisms are  
156 responsible for the observed patterns in lady beetle populations. Although causes of declines in native  
157 species are often studied independently, these drivers may interact to influence native populations  
158 (Didham *et al.*, 2007). For example, habitat modification that transitions natural habitat to more highly  
159 disturbed urban and agricultural habitats may differentially benefit alien species over native lady beetles  
160 (Grez *et al.*, 2013), with implications for direct and indirect competitive interactions among native and  
161 alien species. In contrast, landscapes with less disturbed perennial grasslands can serve as an important  
162 refuge primarily for native lady beetle species, providing prey and habitat requirements necessary for  
163 survival and reproduction (Evans, 2004; Diepenbrock & Finke, 2013). Understanding the magnitude and  
164 drivers of declines in native lady beetle populations will require comprehensive time series data  
165 documenting community responses that can then be used to assess the contribution of the establishment of  
166 alien species and landscape change simultaneously.

167           To understand the relative importance of the establishment of alien species and landscape change  
168 as drivers of native species decline, we compiled historical occurrence records of lady beetles collected in  
169 Ohio, USA from museums and other institutions across the United States. Our goals were to assess long-  
170 term patterns in native lady beetle species occurrence and communities within the region, and to evaluate  
171 the relative importance of the establishment and spread of alien lady beetle species and landscape change  
172 as drivers contributing to native species decline in this community.

173

## 174 **Methods**

### 175 *Lady beetle specimens and data requests*

176           To investigate long-term changes in native lady beetle communities within Ohio, USA (Fig. 1),  
177 we used historic occurrence records for native and alien species within the tribe Coccinellini and four  
178 additional non-Coccinellini species. Targeted Coccinellini genera were *Adalia*, *Anatis*, *Anisosticta*,

179 *Aphidecta*, *Calvia*, *Ceratomegilla*, *Coccinella*, *Coelophora*, *Coleomegilla*, *Cycloneda*, *Harmonia*,  
180 *Hippodamia*, *Macronaemia*, *Mulsantina*, *Myzia*, *Naemia*, *Neoharmonia*, *Olla*, and *Propylea*, and non-  
181 Coccinellini species were *Brachiacantha ursina* (Fabricius), *Chilocorus stigma* (Say), *Hyperaspis*  
182 *undulata* (Say), and *Psyllobora vigintimaculata* (Say). We contacted 59 institutions based within the  
183 United States, the majority of which are hosted by the Entomological Collections Network (ENC, 2020).  
184 Ohio lady beetle records were compiled from 25 institutions with assistance of their curators (see  
185 Appendix 1: Table S1.1 in Supporting Information).

186 Specimen loans were requested from museums and institutions that had unidentified lady beetle  
187 records from Ohio. Any unidentified lady beetle species that were unaccounted for within the collections  
188 of these institutions were not included within our dataset. Lady beetle species identifications were  
189 determined using Gordon (1985). All lady beetle species were characterized by their status (native or  
190 alien to North America) and their primary diet (aphidophagous, coccidophagous, or fungivorous) which  
191 was based on most frequently reported prey (aphids, scales, or fungi) (Angalet *et al.*, 1979; Gordon, 1985;  
192 Dixon & Dixon, 2000; Michaud, 2001; Staines, 2008; Hodek *et al.*, 2012; Majerus, 2016).

### 193 194 *Land use and land cover change analysis*

195 To assess the influence of landscape change on lady beetle communities, we analyzed historical  
196 land use and land cover (LULC) data from four points in time (1938, 1970, 1992, 2016). Annual  
197 historical LULC data were obtained from the US Geological Survey (Sohl *et al.*, 2018) for the years 1938,  
198 1970, and 1992. These historical LULC backcasts were modeled using numerous historical data sets and  
199 created explicitly to extend the National Land Cover Database (NLCD) to earlier time periods, prior to  
200 the availability of remote-sensing data (Sohl *et al.*, 2016). The NLCD and historical backcast data were  
201 crosswalked into four primary land use classes: agriculture, developed, forest, and non-target (i.e., all  
202 other land cover classes found in Ohio) (see Appendix 2: Table S2.1, Table S2.2 in Supporting  
203 Information). The contemporary landscape of Ohio was assessed with the 2016 NLCD (Dewitz, 2019;  
204 Wickham *et al.*, 2021). To assess change over time, we calculated the total area of each cover class, along



205 with the percentage of area occupied by each class, for each county at each of the four time periods.  
206 Although the LULC data have different spatial resolutions (NLCD = 30 m; historical backcasts = 250 m)  
207 they were not resampled, as the derived metrics (e.g. total area of cover class, percentage of county area)  
208 are relative, and therefore comparable across time. Analyses were completed in R (R Core Team, 2020)  
209 using the ‘raster’ and ‘sf’ R packages (Pebesma, 2018; Hijmans, 2020).

210         There was an increase in forest cover from 1938 to 1970, and it has held steady since the early  
211 1990s (see Appendix 2: Fig. S2.6). Most of the increase occurred in the Appalachian Plateau and Lake  
212 Erie Glaciated Plateau regions in the eastern and southern portions of the state (Fig. 2). There was a  
213 steady increase in developed land around existing population centers, with a larger increase in suburban  
214 areas since the early 1990s. The increase in forest and developed lands came at the expense of agricultural  
215 lands, yet this cover class remains the dominant land cover in many counties of the state (Fig. 2; see  
216 Appendix 2: Fig. S2.6). During each time period, there was high variability in the amount of agricultural  
217 and forested land across Ohio counties (see Appendix 2: Fig. S2.6).

218         Land cover data were compiled at the county and decade resolution to align with the spatial and  
219 temporal resolution available for the museum specimen data. For each county, we used an assumed linear  
220 progression between available timepoints to estimate the percentage land cover of a given class in each  
221 decade. The 1930 land cover data were extrapolated using the same procedure with available data from  
222 1938-1970. Because lady beetle data were generally recorded at the county level, we computed the  
223 geographic centroids of each Ohio county based on present-day county boundaries as defined by the Ohio  
224 Department of Transportation (<http://ogrip-eohio.opendata.arcgis.com/datasets/odot-county-boundaries>).

225

## 226 *Statistical analysis*

227         Lady beetle museum records were included in the analyses if they were collected within Ohio,  
228 and we could obtain county-level location data and the year of collection. All analyses were conducted in  
229 R (R Core Team, 2020).

230 Changes in total lady beetle and aphidophagous lady beetle community composition over time  
231 were assessed using incidence-based measures of taxonomic beta-diversity. Due to low county-level  
232 counts, county records of lady beetle species were pooled by Ohio geographic region (Fig. 1; Lake Erie  
233 Glaciated Plateau (LEGP) in the northeast, Appalachian Plateau (AP) in the southeast, Indiana-Ohio Till  
234 Plain (IOTP) in the southwest, and Western Lake Erie Basin (WLEB) in the northwest) and across ten-  
235 year intervals such that patterns of community composition were assessed across 11 decades from the  
236 1900s through the 2010s. First, descriptive patterns of total and aphidophagous lady beetle taxonomic  
237 beta-diversity were evaluated within geographic regions among decades by calculating total Sorensen  
238 dissimilarity ( $\beta_{\text{SOR}}$ ) using the *beta.temp* function in the R package ‘betapart’ (Baselga & Orme, 2012).  
239 Total Sørensen dissimilarity was decomposed into a turnover component ( $\beta_{\text{SIM}}$ ; reflects species  
240 replacement) and a nestedness component ( $\beta_{\text{SNE}}$ ; reflects species loss or gain) (Baselga, 2010). Next,  
241 pairwise dissimilarity matrices for Sørensen dissimilarity ( $\beta_{\text{SOR}}$ ) and the respective components of species  
242 turnover ( $\beta_{\text{SIM}}$ ) and nestedness ( $\beta_{\text{SNE}}$ ) were calculated using the *beta.pair* function in the R package  
243 ‘betapart’ (Baselga & Orme, 2012). Then, permutational multivariate analysis of variance  
244 (PERMANOVA) and analysis of multivariate homogeneity of group dispersions (BETADISPER) were  
245 used to compare  $\beta_{\text{SOR}}$ ,  $\beta_{\text{SIM}}$ , and  $\beta_{\text{SNE}}$  pairwise dissimilarity matrices for total lady beetles and aphidophagous  
246 lady beetles among decades. PERMANOVA tests whether the centroid of communities differs among  
247 groups in multivariate space, while BETADISPER tests whether groups differ in the amount of dispersion  
248 from its spatial median among communities within a group. Differences in total and aphidophagous lady  
249 beetle community composition among decades were visualized using non-metric multidimensional  
250 scaling (NMDS). PERMANOVA, BETADISPER, and NMDS analyses were conducted using the ‘vegan’  
251 package (Oksanen *et al.*, 2011).

252 To determine the relative influence of temporal, landscape, spatial, and community drivers on the  
253 captures of five key species (*A. bipunctata*, *C. novemnotata*, *C. maculata*, *H. convergens*, the four most  
254 abundant native aphidophagous species, and *C. stigma*, the most abundant coccidophagous species), we  
255 constructed negative binomial generalized additive models (GAMs) to describe spatial and temporal

256 patterns for each species using the ‘mgcv’ package (Wood, 2017), and then used an adaptive model  
257 selection procedure for each species in combination with available contextual data to determine the  
258 relative importance of the drivers. Response data took the form of total captures of each species in a given  
259 county, in a given decade. Because the absolute number of records was very sparse earlier in our study  
260 period, we restricted these analyses to specimens captured in or after 1930 for these analyses. For *A.*  
261 *bipunctata* and *C. novemnotata*, which were extremely rare or absent from collections in later decades,  
262 data were culled at 1990 to restrict these analyses of drivers to times when these species were present. We  
263 computed several community variables for each decade-county combination; in addition to absolute  
264 captures of each coccinellid species, including the abundance of two dominant invaders, *C.*  
265 *septempunctata* and *H. axyridis*, the total lady beetles captured, total alien species captured, and the  
266 proportion of the community captures belonging to alien species. All GAMs constructed included an  
267 offset variable of the structure  $\log(1 + \text{total lady beetles captured})$  to account for variability in sampling  
268 effort (with the exception of the model describing sampling effort over time).

269 First, to describe the relative abundance of each key species over time, corrected for varied  
270 sampling intensity, a simple GAM was constructed for each species with decade of capture as the  
271 independent variable, constrained to 3 knots and a smoothing parameter of 0.5. For the spatial analyses,  
272 data were aggregated into three-decade groups, and the captures of each species were modeled using a  
273 negative binomial GAM with a gaussian process smooth and a combination of latitude and longitude,  
274 both in aggregate and then by decade group. Latitude and longitude were included in the model to control  
275 for differences in the spatial distribution of lady beetle collections within the state and to account for  
276 spatial autocorrelation. To examine the interaction of temporal, spatial, landscape, and community factors  
277 on captures of each species, we used a modified backwards-stepping model selection applied to negative  
278 binomial GAMs. First, a global model was constructed that included decade, longitude, latitude,  
279 percentage land cover in agriculture, forest, and developed uses, the total captures of alien species, and  
280 the sampling offset. Because of a high-degree of autocorrelation between the aggregate alien species  
281 metrics, each of these variables was substituted into the model separately, and the variables with the best

282 performance (determined by AIC) were selected for further analysis. Absolute numbers of *C.*  
283 *septempunctata* and *H. axyridis* were considered together in the same model to test if target species were  
284 exhibiting differential responses to the two alien species. After the substitution-based model selection was  
285 completed, the remaining model selection was completed using backwards selection by systematically  
286 dropping each variable with the lowest explanatory power, using AIC as the decision criterion. The  
287 selected model was then subjected to concurvity analysis and if the ‘worst case’ concurvity estimate  
288 exceeded 0.8 for any parameter, the parameter was eliminated from the model and backwards model  
289 selection was resumed (Ross, 2019). Complete data manipulation, community analyses, model  
290 specifications, model selection, and construction of prediction intervals, as well as the development  
291 history of our analyses are available on Github: [https://github.com/BahlaiLab/Ohio\\_ladybeetles](https://github.com/BahlaiLab/Ohio_ladybeetles)

292

## 293 **Results**

294 We compiled 4,194 lady beetle museum records representing 28 species collected in Ohio, USA  
295 from 1900-2018 (Table 1; see Appendix 2: Table S2.3, Figs. S2.1-S2.4). Total collections of native  
296 species varied from year to year, with high numbers collected in the 1930s and 1980s (Fig. 3A). The most  
297 common native species represented in these collections were *Coleomegilla maculata* (Degeer) (16.4% of  
298 total records), *Hippodamia convergens* Guerin (9.5%), *Hippodamia parenthesis* (Say) (8.4%), *Psyllobora*  
299 *vigintimaculata* (Say) (7.6%), *Cycloneda munda* (Say) (7.2%), *Brachiacantha ursina* (Fabricius) (6.1%),  
300 and *Adalia bipunctata* (Linnaeus) (5.2%). Records documented the presence of the aphidophagous alien  
301 species *Coccinella septempunctata* (Linnaeus) (2.4% of total records; first detected in 1978), *Coccinella*  
302 *undecimpunctata* Linnaeus (0.02%; single record in 1953), *Harmonia axyridis* (Pallas) (11.2%; first  
303 detected in 1993), *Hippodamia variegata* (Goeze) (0.2%; first detected in 2000), and *Propylea*  
304 *quatuordecimpunctata* (Linnaeus) (0.6%; first detected in 2003). Collections of alien species began to  
305 increase in the 1980s, with numbers surpassing natives in the 2000s and 2010s (Fig. 3A).

306

307 *Lady beetle species composition*

308           The proportion of native lady beetles comprising collections, including *A. bipunctata*, *C.*  
309 *novemnotata*, and *H. convergens*, has decreased in Ohio since the 1970s as alien lady beetles such as *C.*  
310 *septempunctata* and *H. axyridis* have increased (Fig. 3B). Descriptive patterns of lady beetle taxonomic  
311 beta-diversity ( $\beta_{\text{SOR}}$ ) within geographic regions across decades were the result of species turnover ( $\beta_{\text{SIM}}$ )  
312 and nestedness ( $\beta_{\text{SNE}}$ ), but the strongest contributor to changes in lady beetle community composition  
313 shifted over time (Fig. 4A, B). Nestedness was the primary contributor to patterns of lady beetle beta-  
314 diversity until the 1980s. From 1980-2018, species turnover increasingly became the stronger contributor,  
315 especially for aphidophagous species, and was the dominant driver of lady beetle beta-diversity by the  
316 2010s (Fig. 4A, B). PERMANOVA and NMDS analyses of pairwise beta-diversity matrices identified  
317 decades when significant shifts occurred in lady beetle community composition, primarily driven by  
318 aphidophagous species (see Appendix 2: Table S2.4, Fig. S2.5). Lady beetle beta-diversity ( $\beta_{\text{SOR}}$ ) differed  
319 between the 1920s and 1930s ( $F = 3.88$ ;  $P = 0.014$ ) and between the 1930s and 1940s ( $F = 3.12$ ;  $P =$   
320  $0.003$ ), with species composition in the 1930s being highly similar across geographic regions in Ohio and  
321 nested within the more variable collections from the 1920s and 1940s (see Appendix 2: Fig. S2.5A, B).  
322 Lady beetle beta-diversity ( $\beta_{\text{SOR}}$ ) also differed between the 1980s and 1990s ( $F = 2.94$ ;  $P = 0.021$ ) and  
323 between the 1990s and 2000s ( $F = 3.36$ ;  $P = 0.009$ ), with communities similarly variable among decades,  
324 but collections shifting in species composition (see Appendix 2: Fig. S2.5C, D).

325

### 326 *Drivers of lady beetle populations*

327           Relative captures of all lady beetle species varied with time, indicating that all species had some  
328 form of temporal dependence in the number of individuals captured when accounting only for sampling  
329 effort and using a normal error structure. However, these simple negative binomial models explained  
330 limited variation in the data. Using these simple models, native species were captured less per sampling  
331 effort later in the study period, but the steepness and timing of declines in captures varied by species. The  
332 two alien species exhibited more variable patterns. Captures of *C. septempunctata* initially increased in  
333 residual captures but then decreased during the four decades it has been present in Ohio. Conversely,

334 captures of *H. axyridis* increased over the three decades since its establishment. For *A. bipunctata* and *C.*  
335 *novemnotata*, statistically significant temporal patterns were not observed within the modeled time period,  
336 as both species had relatively stable capture frequency prior to the 1980s but became extremely rare and  
337 then absent in later years of data collection. To provide meaningful model fits for the time when these  
338 species were present, years with zero-biased data were not included in their respective models. Sampling  
339 effort varied dramatically by year and location. Patterns of captures over time were not spatially static, as  
340 several native species also exhibited spatiotemporal dependencies over the study (i.e. changing spatial  
341 distributions with time; see Appendix 3: Table S3.1, Fig. S3.1-S3.5).

342 Species-specific patterns emerged in the negative binomial models that accounted for landscape,  
343 invasion, and spatiotemporal drivers, and model fit was much improved in all cases (Fig. 5; see Appendix  
344 3: Table S3.1). *Adalia bipunctata* exhibited a steep negative response to the increasing proportion of alien  
345 species in the community but also was positively associated with agriculture and developed land covers.  
346 *Coccinella novemnotata* had a strong negative population trend over time as well as spatial dependencies  
347 in its captures but only appeared to respond negatively to agricultural cover as a landscape driver. Since  
348 this native species had already begun to decline prior to invasions by *C. septempunctata* and *H. axyridis*,  
349 there was limited co-occurrence of *C. novemnotata* and any of the alien species (only 5 captures of *C.*  
350 *novemnotata* were recorded after 1980). *Coleomegilla maculata* populations were relatively net stable  
351 over time, with an increase peaking in the 1970s and 1980s, but a net decrease since. Our models suggest  
352 a relatively neutral effect of small numbers of alien lady beetles on *C. maculata*, but a negative impact as  
353 alien species become dominant (i.e. >50% of the lady beetles collected). Additionally, agricultural land  
354 cover had a slight positive association with captures of *C. maculata*. Captures of *H. convergens* had a  
355 negative trend over time and exhibited a differential response to the two dominant alien species: a positive  
356 association with *C. septempunctata* and a negative association with *H. axyridis*, as well as a positive  
357 association with higher values of developed land cover. *Chilocorus stigma* exhibited spatial dependencies  
358 and a positive association with forested habitats, and a negative association with the proportion of alien  
359 lady beetles in the community.

360

## 361 **Discussion**

362 Specimen records can be harnessed to understand long-term biodiversity trends across various  
363 spatial scales in response to anthropogenic threats (Shaffer *et al.*, 1998; Suarez & Tsutsui, 2004; Lister,  
364 2011; Meineke *et al.*, 2019). Using historic occurrence records of lady beetles collected in Ohio, USA, we  
365 report evidence of declines in captures for several native species, but the timing and severity of declines  
366 as well as the relative importance of alien species and land cover change as long-term drivers were  
367 species-specific. Observed changes in species composition that began in the 1980s indicated processes of  
368 species loss/gain and turnover that shifted communities towards dominance of a few alien lady beetle  
369 species.

370

### 371 *Shifts in lady beetle species composition*

372 As collections of some native species declined over time in Ohio, captures of alien lady beetle  
373 species increased following their establishment and spread. Beginning in the 2000s, alien species  
374 comprised over 60% of the total specimens collected, suggesting a shift in lady beetle community  
375 structure and alien species dominance within the state. This shift was further supported by changes in  
376 patterns of total beta-diversity within geographic regions of the state that began in the 1980s. From the  
377 1980s to the 2010s, beta-diversity of lady beetle species increased across decades, and the contribution of  
378 species turnover to these patterns increased compared to previous decades, becoming the dominant driver  
379 of beta-diversity by the 2010s. This finding indicates that lady beetle communities within a geographic  
380 region became increasingly dissimilar over time due to processes of species loss or gain (i.e. species  
381 nestedness) and species replacement (i.e. species turnover) during the period that coincides with alien  
382 lady beetle establishment and spread. Changes in lady beetle species composition from the 1900s to the  
383 1970s were primarily driven by species nestedness. These patterns were the result of the loss and gain of  
384 uncommon native species in collections throughout the state, as well as the loss of common native species  
385 such as *A. bipunctata* and *C. novemnotata* which began to decline prior to alien species arrival. Species

386 composition shifted in the 1980s as dissimilarity of communities increased substantially and the  
387 contribution of species replacement to these patterns increased. High species replacement indicates that a  
388 similar number of lady beetle species were collected within geographic regions among these decades, but  
389 a low number were shared as species were replaced over time.

390 A combination of species nestedness and species turnover that resulted in high dissimilarity in  
391 lady beetle species composition during the 1980s, 1990s, and 2000s is indicative of spatiotemporal loss  
392 and replacement of native species. By the 2010s, lady beetle communities had become more similar to  
393 each other in terms of species composition and were dominated by alien lady beetle species. Similar shifts  
394 in lady beetle communities have been observed in response to the establishment of alien species (Elliott *et*  
395 *al.*, 1996; Alyokhin & Sewell, 2004; Bahlai *et al.*, 2013). For example, a shift in species dominance with  
396 the establishment of *C. septempunctata* in the 1980s was observed in potato fields in Maine, USA  
397 (Alyokhin & Sewell, 2004). Within four years of its establishment in southwestern Michigan, USA, *H.*  
398 *axyridis* was the dominant lady beetle species collected and was found in diverse habitats, including  
399 agricultural and old fields, and poplar plantations (Colunga-Garcia & Gage, 1998). Although the  
400 composition of lady beetle communities has become dominated by exotic species, Bahlai *et al.* (2013)  
401 documented that their potential to suppress pest populations in agricultural and natural habitats had  
402 remained relatively consistent over time. As significant shifts in lady beetle communities have occurred  
403 across the Midwestern US, reliance on alien species to maintain pest suppression may be required for  
404 management, but further declines of native species may affect long-term resilience of this ecosystem  
405 service (Bahlai *et al.*, 2021).

406

#### 407 *Drivers of native lady beetle decline*

408 Using museum specimens collected over twelve decades, we documented declines in captures of  
409 the native species *A. bipunctata*, *C. novemnotata*, *H. convergens*, *C. maculata*, and *C. stigma*. The native  
410 species *A. bipunctata*, *C. novemnotata*, and *H. convergens* were once widely distributed across much of  
411 the United States (Gordon, 1985), with early surveys in Ohio recording these species across the state



412 (Dury, 1879; Bubna, 1902). Now, these species are considered rare or potentially extirpated in much of  
413 eastern North America (Wheeler Jr & Hoebeke, 1995; Elliott *et al.*, 1996; Gardiner *et al.*, 2012). For  
414 example, no captures of *C. novemnotata* or *A. bipunctata* were found after 1985 and 1996, respectively,  
415 suggesting their populations were below the detection threshold or extirpated within the state. While  
416 declines in captures of these native species were observed, the relative importance of alien lady beetles  
417 and land cover change as drivers was species-specific.

418

#### 419 *Adalia bipunctata*

420 We found evidence that declines in captures of the aphidophagous species *A. bipunctata* began in  
421 the 1960s, prior to the arrival and dominance of alien lady beetle species. The last collection of *A.*  
422 *bipunctata* in Ohio occurred in 1996, and since the arrival of *C. septempunctata* in 1978, there were only  
423 13 individuals of this native species collected from the state. During this period of overlap with alien  
424 species, collections of *A. bipunctata* decreased as the proportion of captures of alien species increased  
425 within the community. Reports from southwestern Michigan also observed declines in *A. bipunctata* over  
426 24 years with increasing dominance of alien species (Bahlai *et al.*, 2015). *Harmonia axyridis* was first  
427 collected in Ohio in 1993 and shares an affinity for arboreal habitats with *A. bipunctata* (Colunga-Garcia  
428 & Gage, 1998; Honek *et al.*, 2019). Although our findings indicate that alien species likely contributed to  
429 declines in captures of *A. bipunctata* to some degree, declines in captures prior to the arrival of alien  
430 species suggests other contributing factors such as landscape change. We found that collections of *A.*  
431 *bipunctata* increased with percentage of agricultural and developed land cover. Land cover change  
432 analyses showed agricultural land cover decreased, while developed land cover increased over time. We  
433 hypothesize that declines in captures of this native species could be related to reductions in aphid prey  
434 availability due to a combination of landscape stressors such as reductions in agricultural land cover  
435 paired with improved pest management practices as well as improved air and/or habitat quality in urban  
436 environments that reduce pest outbreaks (Sloggett, 2017).

437

438 *Coccinella novemnotata*

439 We found no evidence that declines in captures of the aphidophagous species *C. novemnotata* in  
440 Ohio were related to alien lady beetles, as this species was nearly absent from collections by the time *C.*  
441 *septempunctata* was recorded in 1978. Captures of *C. novemnotata* began to decline in the 1950s prior to  
442 the arrival of alien species, with the last Ohio collection occurring in 1985. Since the arrival of *C.*  
443 *septempunctata* in Ohio, only 12 individuals of this native species were recorded. This finding contrasts  
444 with many studies that have hypothesized declines of *C. novemnotata* were related to competitive  
445 displacement by *C. septempunctata* (Staines Jr *et al.*, 1990; Wheeler Jr & Hoebeke, 1995; Snyder &  
446 Evans, 2006). For instance, declines of *C. novemnotata* have been widely reported during the 1970s and  
447 1980s, which coincides with the establishment and spread of *C. septempunctata* (Wheeler Jr & Hobeke,  
448 1995 and references therein). We found that captures of *C. novemnotata* decreased with increasing  
449 agricultural land cover, with declines beginning around the 1950s. Since the 1930s, the amount of  
450 agricultural land cover has decreased within the state, but the spatial extent of these changes was highly  
451 variable and not consistent across all Ohio counties. This loss of agriculture was primarily in the eastern  
452 region of the state, while western Ohio remained dominated by agricultural land cover throughout the  
453 study period. Along with these changes in the extent of agricultural land cover, landscapes have  
454 experienced a shift from more diversified cropping systems to highly managed crop monocultures since  
455 the mid-1900s (Crossley *et al.*, 2021). *Coccinella novemnotata* has a broad ecological niche (Losey *et al.*,  
456 2007), and populations have been found in a variety of cultivated crops (Wheeler Jr & Hoebeke, 1995),  
457 including alfalfa (Goodarzy & Davis, 1958; Pimentel & Wheeler, 1973), corn (Smith, 1971), cotton (Bell  
458 & Whitcomb, 1964), soybeans (Dumas *et al.*, 1964), and fruit trees (Oatman *et al.*, 1964; Putman, 1964).  
459 Simplification of agricultural landscapes due to loss of natural habitat and reductions in crop diversity  
460 may impact temporal prey availability and diversity as well as refuge and overwintering habitats that are  
461 required for predatory insect species such as *C. novemnotata* (Rusch *et al.*, 2016).

462

463 *Coleomegilla maculata*

464 Captures of the aphidophagous species *C. maculata* increased slightly and then declined with  
465 increasing dominance of alien species within the community. *Coleomegilla maculata* is known to be a  
466 strong aphidophagous competitor (Long & Finke, 2014), and this species remains one of the most  
467 frequently collected native lady beetles in croplands and grasslands (Smith and Gardiner 2013). For  
468 example, *C. maculata* was commonly collected in residential gardens across the state of Ohio by  
469 community scientists (Gardiner *et al.*, 2012; Gardiner *et al.*, 2021). However, declines in *C. maculata*  
470 populations were reported during a long-term study in southwestern Michigan (Bahlai *et al.*, 2015).  
471 *Coleomegilla maculata* feeds on pollen in addition to aphid prey (Dixon & Dixon, 2000; Hodek *et al.*,  
472 2012; Majerus, 2016), and this pollen feeding was hypothesized to reduce competition with alien species  
473 (Bahlai *et al.*, 2015). However, there is evidence that *H. axyridis* and *C. septempunctata* also feed on  
474 pollen as a supplemental food resource when arthropod prey is scarce (Ricci *et al.*, 2005; Berkvens *et al.*,  
475 2008; Berkvens *et al.*, 2010). Therefore, the dietary niche overlap and thus the impacts of alien species on  
476 *C. maculata* may have been underestimated.

477

#### 478 *Hippodamia convergens*

479 Our findings isolated *H. axyridis* as the major driver of declines in captures of the aphidophagous  
480 species *H. convergens*. *Hippodamia convergens* was last collected in Ohio in 2015, although only 18  
481 individuals are recorded from 1990-2015. Collections of *H. convergens* declined with captures of *H.*  
482 *axyridis* but increased with captures of *C. septempunctata*. These divergent patterns highlight that alien  
483 lady beetle species are not ecologically equivalent, and instead, can have different impacts on native  
484 species. *Hippodamia convergens* also was positively associated with percentage of developed land. The  
485 effects of urbanization on lady beetles are highly context dependent, as previous studies have reported  
486 positive (Egerer *et al.*, 2017; Honek *et al.*, 2018; Liere *et al.*, 2019) and negative (Rocha *et al.*, 2018; Grez  
487 *et al.*, 2019; Parker *et al.*, 2020) associations. However, as *H. convergens* has widely declined within the  
488 study region over the past several decades while urban habitat has increased, this observed positive

489 association does not appear to be a major driver of their population status and could reflect a sampling  
490 bias wherein this rare species was more likely to be collected in densely populated areas.

491

#### 492 *Chilocorus stigma*

493 Collections of the coccidophagous species *C. stigma* declined as the proportion of alien species  
494 increased in the community, suggesting that aphidophagous alien lady beetles may affect non-  
495 aphidophagous native species to some extent. Likewise, decline of *C. stigma* immediately following the  
496 establishment of *H. axyridis* has been reported in southwestern Michigan, USA, further suggesting  
497 potential competitive interactions among these species (Colunga-Garcia & Gage, 1998). Although *H.*  
498 *axyridis* is primarily aphidophagous (Koch, 2003), this species also feeds on scale insects in arboreal  
499 environments (McClure, 1986), which suggests some degree of dietary and habitat overlap with *C. stigma*.  
500 *Chilocorus stigma* was the only native lady beetle associated with forest land cover, with captures  
501 increasing as the percentage of forest increased at the county level. This response is likely linked with the  
502 ecology of this species. Scale insects are common pests of trees in managed and natural forests. Further,  
503 *C. stigma* is reported to oviposit eggs in bark cracks and crevices as well as overwinter as adults in the  
504 leaf litter layer (Mayer & Allen, 1983). Similar patterns have been found in other native lady beetle  
505 surveys. For instance, the amount of forest habitat at a 2 km landscape scale was positively associated  
506 with native lady beetle abundance and species diversity within residential gardens (Gardiner *et al.*, 2021).  
507 The conservation value of forests for native lady beetles may be underestimated, but additional research is  
508 required to understand when and how native species are utilizing these habitats.

509

#### 510 *Conclusions*

511 Using specimen records collected over 118 years in Ohio, USA, we documented shifts in lady  
512 beetle species composition beginning in the 1980s as communities became increasingly dominated by  
513 alien species. Because of uneven sampling inherent to museum collections, total records of native lady  
514 beetles varied from year to year, which made it difficult to detect any changes in absolute abundance at

515 the community-level. Therefore, our methodology and results cannot provide evidence that all native lady  
516 beetles are in decline. Such stochasticity may be inherent to lady beetle biology as native populations are  
517 known to experience boom-bust cycles (Bahlai *et al.*, 2015) and other studies have reported similar year  
518 to year variability in their numbers (Elliott & Kieckhefer, 1990; Kieckhefer & Elliott, 1990; Elliott *et al.*,  
519 1996; Harmon *et al.*, 2007). Despite patterns of annual variation, we detected evidence of declines in  
520 captures of several native lady beetle species, including several aphidophagous species and a  
521 coccidophagous species, via decreasing representation in the sampled community of lady beetles.

522         The use of long-term specimen records facilitated investigation of the relative importance of the  
523 establishment of alien species and landscape change as drivers of native lady beetle decline. Drivers of  
524 declines in captures of native lady beetles were highly species-specific, emphasizing that mechanisms  
525 driving population losses cannot be generalized even among closely related species. Additionally, this  
526 finding highlights the importance of species-level data when investigating temporal trends in insect  
527 populations. Although the establishment of exotic species and landscape change have been identified as  
528 major drivers of spatiotemporal patterns in insect populations (Fox *et al.*, 2014; Sánchez-Bayo &  
529 Wyckhuys, 2019; Seibold *et al.*, 2019), the causes of declines are likely more complex and multifaceted  
530 (Homburg *et al.*, 2019; Wagner, 2020; Wagner *et al.*, 2021). Our study underscores this complexity by  
531 documenting how closely related native lady beetle species displayed opposing, species-specific  
532 responses to alien species and land cover change. For several native species investigated, the dominance  
533 of alien lady beetles was identified as a major contributor to declines in captures, but other native species  
534 began to decline prior to alien species establishment. The importance of landscape change as a driver  
535 structuring the distributions of lady beetle populations suggests biodiversity conservation management is  
536 required at the landscape scale. Landscape scale management will need to balance the opposing needs of  
537 native species to be effective. Importantly, we are unable to disentangle the effects of historical changes  
538 in land cover with more recent intensification and simplification of agricultural landscapes on these  
539 observed trends in captures. Native lady beetle species are key predators of aphids, scales, psyllids, mites,  
540 fungi, and other pests (Evans, 2009; Hodek & Honěk, 2009; Weber & Lundgren, 2009), contributing

541 broadly to biological control in agricultural systems (Caltagirone & Doult, 1989; Obrycki & Kring, 1998;  
542 Rondoni *et al.*, 2021). Increased dominance of alien lady beetles indicates that these species may be  
543 required to maintain successful pest management in the future. Understanding how these major  
544 anthropogenic drivers influence long-term trends in native lady beetle populations will inform the  
545 conservation of this ecologically and economically important family of insects.

546

## 547 **Acknowledgements**

548 We acknowledge the institutions and their curators for their time and assistance with compiling lady  
549 beetle specimen records: California Academy of Sciences (Susan Gin and Christopher C. Grinter);  
550 Natural History Museum of Los Angeles County (Brian Brown and Weiping Xie); Peabody Museum,  
551 Yale University (Lawrence Gall); Biodiversity Research Collections, University of Connecticut (Jane  
552 O'Donnell); Smithsonian National Museum of Natural History (Natalie Vandenburg); Collection of  
553 Arthropods, University of Georgia (Joseph V. McHugh and E. Richard Hoebeke); Gantz Family  
554 Collections Center, The Field Museum (Rebekah Shuman Baquiran); Illinois Natural History Survey,  
555 University of Illinois (Thomas McElrath); Louisiana State Arthropod Museum, Louisiana State  
556 University (Victoria Moseley Bayless); A.J. Cook Arthropod Research Collection, Michigan State  
557 University (Gary L. Parsons); Museum of Zoology, University of Michigan (Erika Tucker); University of  
558 Minnesota (Robin Thomson); Wilbur R. Enns Entomology Museum, University of Missouri (Kristin B.  
559 Simpson); Mississippi Entomological Museum, Mississippi State University (Terence L. Schiefer); C.A.  
560 Triplehorn Insect Collection, The Ohio State University (Luciana Musetti); Cleveland Museum of Natural  
561 History (Nicole Gunter); Carnegie Museum of Natural History (Robert Androw and Robert Davidson);  
562 The Frost Entomological Museum, Pennsylvania State University; Clemson University Arthropod  
563 Collection, Clemson University (Michael Ferro); Severin-McDaniel Insect Research Collection, South  
564 Dakota State University (Louis Hesler); Brigham Young University (Shawn M. Clark); Crane Hollow  
565 Nature Preserve (Gary and Holly Coovert); Agricultural Technical Institute Teaching Collection, The  
566 Ohio State University (Jon Van Gray). Ohio lady beetle records from Boonshoft Museum of Discovery

567 were provided by Kaitlin U. Campbell and Thomas O. Crist, and records from The Lost Ladybug Project  
568 (<http://www.lostladybug.org/>) were made available by Rebecca Smyth. This work was partially supported  
569 by a grant to CAB from the National Science Foundation DBI #2045721.

570

#### 571 **Author Contributions**

572 M.M. Gardiner, K.I. Perry, and C.A. Bahlai conceived, designed, and implemented the study; K.I. Perry,  
573 C.B. Riley, K. J. Turo, L. Taylor, J. Radl, Y.A. Delegado de la flor, and F. S. Sivakoff compiled the  
574 specimen data; K.I. Perry, C.A. Bahlai, and T.J. Assal analyzed and interpreted the data; K.I. Perry wrote  
575 the first draft of the manuscript; all authors reviewed and edited the manuscript.

576

#### 577 **Data availability statement**

578 The data and analyses code that support the findings of this study are openly available on GitHub:

579 [https://github.com/BahlaiLab/Ohio\\_ladybeetles](https://github.com/BahlaiLab/Ohio_ladybeetles)

580

581 **References**

- 582 Alyokhin, A. & Sewell, G. (2004) Changes in a lady beetle community following the establishment of  
583 three alien species. *Biological Invasions*, 6, 463-471.
- 584 Angalet, G.W., Tropp, J.M. & Eggert, A.N. (1979) *Coccinella septempunctata* in the United States:  
585 Recolonizations and notes on its ecology. *Environmental Entomology*, 8, 896-901.
- 586 Bahlai, C.A. & Zipkin, E.F. (2020) The Dynamic Shift Detector: An algorithm to identify changes in  
587 parameter values governing populations. *PLOS Computational Biology*, 16, e1007542.
- 588 Bahlai, C.A., Colunga-Garcia, M., Gage, S.H. & Landis, D.A. (2013) Long-term functional dynamics of  
589 an aphidophagous coccinellid community remain unchanged despite repeated invasions. *PLoS*  
590 *ONE*, 8, e83407.
- 591 Bahlai, C.A., Colunga-Garcia, M., Gage, S.H. & Landis, D.A. (2015) The role of exotic lady beetles in  
592 the decline of native lady beetle populations: Evidence from long-term monitoring. *Biological*  
593 *Invasions*, 17, 1005-1024.
- 594 Bahlai, C.A., Hart, C., Kavanaugh, M.T., White, J.D., Ruess, R.W., Brinkman, T.J., Ducklow, H.W.,  
595 Foster, D.R., Fraser, W.R., Genet, H., Groffman, P.M., Hamilton, S.K., Johnstone, J.F., Kielland,  
596 K., Landis, D.A., Mack, M.C., Sarnelle, O. & Thompson, J.R. (2021) Cascading effects: insights  
597 from the U.S. Long Term Ecological Research Network. *Ecosphere*, 12, e03430.
- 598 Baselga, A. (2010) Partitioning the turnover and nestedness components of beta diversity. *Global Ecology*  
599 *and Biogeography*, 19, 134-143.
- 600 Baselga, A. & Orme, C.D.L. (2012) betapart: an R package for the study of beta diversity. *Methods in*  
601 *Ecology and Evolution*, 3, 808-812.
- 602 Bell, K.O. & Whitcomb, W.H. (1964) Field studies on egg predators of the bollworm, *Heliothis zea*  
603 (Boddie). *The Florida Entomologist*, 47, 171-180.
- 604 Berkvens, N., Bonte, J., Berkvens, D., Deforce, K., Tirry, L. & De Clercq, P. (2008) Pollen as an  
605 alternative food for *Harmonia axyridis*. *BioControl*, 53, 201-210.
- 606 Berkvens, N., Landuyt, C., Deforce, K., Berkvens, D., Tirry, L. & De Clercq, P. (2010) Alternative foods  
607 for the multicoloured Asian lady beetle *Harmonia axyridis* (Coleoptera: Coccinellidae). *European*  
608 *Journal of Entomology*, 107, 189-195.
- 609 Boakes, E.H., McGowan, P.J.K., Fuller, R.A., Chang-qing, D., Clark, N.E., O'Connor, K. & Mace, G.M.  
610 (2010) Distorted views of biodiversity: Spatial and temporal bias in species occurrence data.  
611 *PLOS Biology*, 8, e1000385.
- 612 Brooks, D.R., Bajer, J.E., Clark, S.J., Monteith, D.T., Andrews, C., Corbett, S.J., Beaumont, D.A. &  
613 Chapman, J.W. (2012) Large carabid beetle declines in a United Kingdom monitoring network  
614 increases evidence for a widespread loss in insect biodiversity. *Journal of Applied Ecology*, 49,  
615 1009-1019.



- 616 Brown, P.M.J. & Roy, H.E. (2018) Native ladybird decline caused by the invasive harlequin ladybird  
617 *Harmonia axyridis*: Evidence from a long-term field study. *Insect Conservation and Diversity*,  
618 11, 230-239.
- 619 Brown, P.M.J., Ingels, B., Wheatley, A., Rhule, E.L., de Clercq, P., van Leeuwen, T. & Thomas, A.  
620 (2015) Intraguild predation by *Harmonia axyridis* (Coleoptera: Coccinellidae) on native insects in  
621 Europe: Molecular detection from field samples. *Entomological Science*, 18, 130-133.
- 622 Bubna, M. (1902) Coleoptera of Cuyahoga County, Ohio. *Ohio Naturalist*, 2, 193-197.
- 623 Caltagirone, L.E. & Doutt, R.L. (1989) The history of the Vedalia beetle importation to California and its  
624 impact on the development of biological control. *Annual Review of Entomology*, 34, 1-16.
- 625 Cardoso, P., Barton, P.S., Birkhofer, K., Chichorro, F., Deacon, C., Fartmann, T., Fukushima, C.S.,  
626 Gaigher, R., Habel, J.C., Hallmann, C.A., Hill, M.J., Hochkirch, A., Kwak, M.L., Mammola, S.,  
627 Ari Noriega, J., Orfinger, A.B., Pedraza, F., Pryke, J.S., Roque, F.O., Settele, J., Simaika, J.P.,  
628 Stork, N.E., Suhling, F., Vorster, C. & Samways, M.J. (2020) Scientists' warning to humanity on  
629 insect extinctions. *Biological Conservation*, 242, 108426.
- 630 Ceballos, G., Ehrlich, P.R., Barnosky, A.D., García, A., Pringle, R.M. & Palmer, T.M. (2015)  
631 Accelerated modern human-induced species losses: Entering the sixth mass extinction. *Science*  
632 *Advances*, 1, e1400253.
- 633 Chen, I.-C., Shiu, H.-J., Benedick, S., Holloway, J.D., Chey, V.K., Barlow, H.S., Hill, J.K. & Thomas,  
634 C.D. (2009) Elevation increases in moth assemblages over 42 years on a tropical mountain.  
635 *Proceedings of the National Academy of Sciences*, 106, 1479-1483.
- 636 Colla, S.R., Gadallah, F., Richardson, L., Wagner, D. & Gall, L. (2012) Assessing declines of North  
637 American bumble bees (*Bombus* spp.) using museum specimens. *Biodiversity and Conservation*,  
638 21, 3585-3595.
- 639 Colunga-Garcia, M. & Gage, S.H. (1998) Arrival, establishment, and habitat use of the multicolored  
640 Asian lady beetle (Coleoptera: Coccinellidae) in a Michigan landscape. *Environmental*  
641 *Entomology*, 27, 1574-1580.
- 642 Conrad, K.F., Warren, M.S., Fox, R., Parsons, M.S. & Woiwod, I.P. (2006) Rapid declines of common,  
643 widespread British moths provide evidence of an insect biodiversity crisis. *Biological*  
644 *Conservation*, 132, 279-291.
- 645 Crossley, M.S., Burke, K.D., Schoville, S.D. & Radeloff, V.C. (2021) Recent collapse of crop belts and  
646 declining diversity of US agriculture since 1840. *Global Change Biology*, 27, 151-164.
- 647 Crossley, M.S., Meier, A.R., Baldwin, E.M., Berry, L.L., Crenshaw, L.C., Hartman, G.L., Lagos-Kutz,  
648 D., Nichols, D.H., Patel, K., Varriano, S., Snyder, W.E. & Moran, M.D. (2020) No net insect  
649 abundance and diversity declines across US Long Term Ecological Research sites. *Nature*  
650 *Ecology & Evolution*, 4, 1368-1376.
- 651 Dewitz, J. (2019) National Land Cover Database (NLCD) 2016 Products (ver. 2.0, July 2020): U.S.  
652 Geological Survey data release. <https://doi.org/10.5066/P96HHBIE>.

- 653 Didham, R.K., Tylianakis, J.M., Gemmell, N.J., Rand, T.A. & Ewers, R.M. (2007) Interactive effects of  
654 habitat modification and species invasion on native species decline. *Trends in Ecology &*  
655 *Evolution*, 22, 489-496.
- 656 Didham, R.K., Basset, Y., Collins, C.M., Leather, S.R., Littlewood, N.A., Menz, M.H.M., Müller, J.,  
657 Packer, L., Saunders, M.E., Schönrogge, K., Stewart, A.J.A., Yanoviak, S.P. & Hassall, C. (2020)  
658 Interpreting insect declines: Seven challenges and a way forward. *Insect Conservation and*  
659 *Diversity*, 13, 103-114.
- 660 Diepenbrock, L.M. & Finke, D.L. (2013) Refuge for native lady beetles (Coccinellidae) in perennial  
661 grassland habitats. *Insect Conservation and Diversity*, 6, 671-679.
- 662 Diepenbrock, L.M., Fothergill, K., Tindall, K.V., Losey, J.E., Smyth, R.R. & Finke, D.L. (2016) The  
663 influence of exotic lady beetle (Coleoptera: Coccinellidae) establishment on the species  
664 composition of the native lady beetle community in Missouri. *Environmental Entomology*, 45,  
665 855-864.
- 666 Dirzo, R. & Raven, P.H. (2003) Global state of biodiversity and loss. *Annual Review of Environment and*  
667 *Resources*, 28, 137-167.
- 668 Dixon, A.F.G. & Dixon, A.E. (2000) *Insect predator-prey dynamics: ladybird beetles and biological*  
669 *control*. Cambridge University Press.
- 670 Dumas, B.A., Boyer, W.P. & Whitcomb, W.H. (1964) Effect of various factors on surveys of predaceous  
671 insects in soybeans. *Journal of the Kansas Entomological Society*, 37, 192-201.
- 672 Dury, C. (1879) List of the Coleoptera observed in the vicinity of Cincinnati. *The Journal of the*  
673 *Cincinnati Society of Natural History*, 2, 162-178.
- 674 Egerer, M., Li, K. & Ong, T.W. (2018) Context matters: Contrasting ladybird beetle responses to urban  
675 environments across two US regions. *Sustainability*, 10
- 676 Egerer, M.H., Bichier, P. & Philpott, S.M. (2017) Landscape and local habitat correlates of lady beetle  
677 abundance and species richness in urban agriculture. *Annals of the Entomological Society of*  
678 *America*, 110, 97-103.
- 679 Elliott, N.C. & Kieckhefer, R.W. (1990) Dynamics of aphidophagous coccinellid assemblages in small  
680 grain fields in eastern South Dakota. *Environmental Entomology*, 19, 1320-1329.
- 681 Elliott, N.C., Kieckhefer, R. & Kauffman, W. (1996) Effects of an invading coccinellid on native  
682 coccinellids in an agricultural landscape. *Oecologia*, 105, 537-544.
- 683 Entomological Collections Network (ENC) (2020) Collections and Archives. Retrieved from  
684 <https://ecnweb.net/resources/collections/>, 30 October 2020.
- 685 Evans, E.W. (2004) Habitat displacement of North American ladybirds by an introduced  
686 species. *Ecology*, 85, 637-647.
- 687 Evans, E.W. (2009) Lady beetles as predators of insects other than Hemiptera. *Biological Control*, 51,  
688 255-267.

- 689 Fox, R., Oliver, T.H., Harrower, C., Parsons, M.S., Thomas, C.D. & Roy, D.B. (2014) Long-term changes  
690 to the frequency of occurrence of British moths are consistent with opposing and synergistic  
691 effects of climate and land-use changes. *Journal of Applied Ecology*, 51, 949-957.
- 692 Gagnon, A.-È., Heimpel, G.E. & Brodeur, J. (2011) The ubiquity of intraguild predation among predatory  
693 arthropods. *PLoS ONE*, 6, e28061.
- 694 Gardiner, M.M., Allee, L.L., Brown, P.M.J., Losey, J.E., Roy, H.E. & Smyth, R.R. (2012) Lessons from  
695 lady beetles: Accuracy of monitoring data from US and UK citizen-science programs. *Frontiers in*  
696 *Ecology and the Environment*, 10, 471-476.
- 697 Gardiner, M.M., Perry, K.I., Riley, C.B., Turo, K.J., Delgado de la flor, Y.A. & Sivakoff, F.S. (2021)  
698 Community science data suggests that urbanization and forest habitat loss threaten  
699 aphidophagous native lady beetles. *Ecology and Evolution*, 11, 2761-2774.
- 700 Gardiner, M.M., Landis, D.A., Gratton, C., Schmidt, N., O'Neal, M., Mueller, E., Chacon, J., Heimpel,  
701 G.E. & DiFonzo, C.D. (2009) Landscape composition influences patterns of native and exotic  
702 lady beetle abundance. *Diversity and Distributions*, 15, 554-564.
- 703 Goodarzy, K. & Davis, D.W. (1958) Natural enemies of the spotted alfalfa aphid in Utah. *Journal of*  
704 *Economic Entomology*, 51, 612-616.
- 705 Gordon, R.D. (1985) The Coccinellidae (Coleoptera) of America north of Mexico. *Journal of the New*  
706 *York Entomological Society*, 93, 912 pp.
- 707 Grez, A.A., Rand, T.A., Zaviezo, T. & Castillo-Serey, F. (2013) Land use intensification differentially  
708 benefits alien over native predators in agricultural landscape mosaics. *Diversity and Distributions*,  
709 19, 749-759.
- 710 Grez, A.A., Zaviezo, T., Gardiner, M.M. & Alaniz, A.J. (2019) Urbanization filters coccinellids  
711 composition and functional trait distributions in greenspaces across greater Santiago, Chile.  
712 *Urban Forestry & Urban Greening*, 38, 337-345.
- 713 Grixti, J.C., Wong, L.T., Cameron, S.A. & Favret, C. (2009) Decline of bumble bees (*Bombus*) in the  
714 North American Midwest. *Biological Conservation*, 142, 75-84.
- 715 Habel, J.C., Segerer, A., Ulrich, W., Torchyk, O., Weisser, W.W. & Schmitt, T. (2016) Butterfly  
716 community shifts over two centuries. *Conservation Biology*, 30, 754-762.
- 717 Hallmann, C.A., Sorg, M., Jongejans, E., Siepel, H., Hofland, N., Schwan, H., Stenmans, W., Müller, A.,  
718 Sumser, H., Hörden, T., Goulson, D. & de Kroon, H. (2017) More than 75 percent decline over 27  
719 years in total flying insect biomass in protected areas. *PLoS ONE*, 12, e0185809.
- 720 Harmon, J.P., Stephens, E. & Losey, J. (2007) The decline of native coccinellids (Coleoptera:  
721 Coccinellidae) in the United States and Canada. *Journal of Insect Conservation*, 11, 85-94.
- 722 Hijmans, R.J. (2020) raster: Geographic data analysis and modeling, R package version 3.5-2,  
723 <https://cran.r-project.org/web/packages/raster/index.html>.
- 724 Hodek, I. & Honěk, A. (2009) Scale insects, mealybugs, whiteflies and psyllids (Hemiptera,  
725 Sternorrhyncha) as prey of ladybirds. *Biological Control*, 51, 232-243.

- 726 Hodek, I. & Michaud, J. (2013) Why is *Coccinella septempunctata* so successful? (A point-of-view).  
727 European Journal of Entomology, 105, 1-12.
- 728 Hodek, I., Honek, A. & Van Emden, H.F. (2012) Ecology and behaviour of the ladybird beetles  
729 (Coccinellidae). John Wiley & Sons.
- 730 Honek, A., Martinkova, Z., Roy, H.E., Dixon, A.F., Skuhrovec, J., Pekár, S. and Brabec, M. (2019)  
731 Differences in the phenology of *Harmonia axyridis* (Coleoptera: Coccinellidae) and native  
732 coccinellids in Central Europe. Environmental Entomology, 48, 80-87.
- 733 Homburg, K., Drees, C., Boutaud, E., Nolte, D., Schuett, W., Zumstein, P., von Ruschkowski, E. &  
734 Assmann, T. (2019) Where have all the beetles gone? Long-term study reveals carabid species  
735 decline in a nature reserve in Northern Germany. Insect Conservation and Diversity, 12, 268-277.
- 736 Honek, A., Martinkova, Z. & Strobach, J. (2018) Effect of aphid abundance and urbanization on the  
737 abundance of *Harmonia axyridis* (Coleoptera: Coccinellidae). European Journal of Entomology,  
738 115, 703-707.
- 739 Honek, A., Martinkova, Z., Kindlmann, P., Ameixa, O.M.C.C. & Dixon, A.F.G. (2014) Long-term trends  
740 in the composition of aphidophagous coccinellid communities in Central Europe. Insect  
741 Conservation and Diversity, 7, 55-63.
- 742 Honek, A., Dixon, A.F.G., Soares, A.O., Skuhrovec, J. & Martinkova, Z. (2017) Spatial and temporal  
743 changes in the abundance and composition of ladybird (Coleoptera: Coccinellidae) communities.  
744 Current Opinion in Insect Science, 20, 61-67.
- 745 Johnson, K.G., Brooks, S.J., Fenberg, P.B., Glover, A.G., James, K.E., Lister, A.M., Michel, E., Spencer,  
746 M., Todd, J.A., Valsami-Jones, E., Young, J.R. & Stewart, J.R. (2011) Climate change and  
747 biosphere response: Unlocking the collections vault. BioScience, 61, 147-153.
- 748 Katsanis, A., Babendreier, D., Nentwig, W. & Kenis, M. (2013) Intraguild predation between the invasive  
749 ladybird *Harmonia axyridis* and non-target European coccinellid species. BioControl, 58, 73-83.
- 750 Kharouba, H.M., Lewthwaite, J.M.M., Guralnick, R., Kerr, J.T. & Vellend, M. (2019) Using insect  
751 natural history collections to study global change impacts: challenges and opportunities.  
752 Philosophical Transactions of the Royal Society B: Biological Sciences, 374, 20170405.
- 753 Kieckhefer, R.W. & Elliott, N.C. (1990) A 13-year survey of the aphidophagous Coccinellidae in maize  
754 fields in eastern South Dakota. The Canadian Entomologist, 122, 579-581.
- 755 Koch, R.L. (2003) The multicolored Asian lady beetle, *Harmonia axyridis*: A review of its biology, uses  
756 in biological control, and non-target impacts. Journal of Insect Science, 3:32
- 757 LaMana, M.L. & Miller, J.C. (1996) Field observations on *Harmonia axyridis* Pallas (Coleoptera:  
758 Coccinellidae) in Oregon. Biological Control, 6, 232-237.
- 759 Li, H., Li, B., Lövei, G.L., Kring, T.J. & Obrycki, J.J. (2021) Interactions among native and non-native  
760 predatory Coccinellidae influence biological control and biodiversity. Annals of the  
761 Entomological Society of America, 114, 119-136.

- 762 Liere, H., Egerer, M.H. & Philpott, S.M. (2019) Environmental and spatial filtering of ladybird beetle  
763 community composition and functional traits in urban landscapes. *Journal of Urban Ecology*, 5:  
764 1-12
- 765 Lister, A.M. (2011) Natural history collections as sources of long-term datasets. *Trends in Ecology &*  
766 *Evolution*, 26, 153-154.
- 767 Long, E.Y. & Finke, D.L. (2014) Contribution of predator identity to the suppression of herbivores by a  
768 diverse predator assemblage. *Environmental Entomology*, 43, 569-576.
- 769 Losey, J.E. & Vaughan, M. (2006) The economic value of ecological services provided by insects.  
770 *BioScience*, 56, 311-323.
- 771 Losey, J.E., Perlman, J.E. & Hoebeke, E.R. (2007) Citizen scientist rediscovers rare nine-spotted lady  
772 beetle, *Coccinella novemnotata*, in eastern North America. *Journal of Insect Conservation*, 11,  
773 415-417.
- 774 Lövei, G.L. (1997) Global change through invasion. *Nature*, 388, 627-628.
- 775 Mace, G.M., Norris, K. & Fitter, A.H. (2012) Biodiversity and ecosystem services: a multilayered  
776 relationship. *Trends in Ecology & Evolution*, 27, 24-31.
- 777 Maes, D. & Van Dyck, H. (2001) Butterfly diversity loss in Flanders (north Belgium): Europe's worst  
778 case scenario? *Biological Conservation*, 99, 263-276.
- 779 Majerus, M.E. (2016) A natural history of ladybird beetles. Cambridge University Press.
- 780 Mayer, M. & Allen, D.C. (1983) *Chilocorus stigma* (Coleoptera: Coccinellidae) and other predators of  
781 beech scale in central New York. In: Proceedings, IUFRO Beech Bark Disease Working Party  
782 Conference; 1982 September 26-October 8; Hamden, CT. USDA Forest Service, Northeastern  
783 Forest Experiment Station. Gen. Tech. Rep. WO-37. US Department of Agriculture, Forest  
784 Service: 89-98. (ed by, pp. 89-98.
- 785 McClure, M.S. (1986) Role of predators in regulation of endemic populations of *Matsucoccus*  
786 *matsumurae* (Homoptera: Margarodidae) in Japan. *Environmental Entomology*, 15, 976-983.
- 787 Meineke, E.K. & Daru, B.H. (2021) Bias assessments to expand research harnessing biological  
788 collections. *Trends in Ecology & Evolution*, 36, 1071-1082.
- 789 Meineke, E.K., Davies, T.J., Daru, B.H. & Davis, C.C. (2019) Biological collections for understanding  
790 biodiversity in the Anthropocene. *Philosophical Transactions of the Royal Society B: Biological*  
791 *Sciences*, 374, 20170386.
- 792 Michaud, J.P. (2001) Numerical response of *Olla v-nigrum* (Coleoptera: Coccinellidae) to infestations of  
793 Asian citrus psyllid, (Hemiptera: Psyllidae) in Florida. *The Florida Entomologist*, 84, 608-612.
- 794 Montgomery, G.A., Dunn, R.R., Fox, R., Jongejans, E., Leather, S.R., Saunders, M.E., Shortall, C.R.,  
795 Tingley, M.W. & Wagner, D.L. (2020) Is the insect apocalypse upon us? How to find out.  
796 *Biological Conservation*, 241, 108327.

- 797 Newbold, T., Hudson, L.N., Hill, S.L.L., Contu, S., Lysenko, I., Senior, R.A., Börger, L., Bennett, D.J.,  
798 Choimes, A., Collen, B., Day, J., De Palma, A., Díaz, S., Echeverria-Londoño, S., Edgar, M.J.,  
799 Feldman, A., Garon, M., Harrison, M.L.K., Alhusseini, T., Ingram, D.J., Itescu, Y., Kattge, J.,  
800 Kemp, V., Kirkpatrick, L., Kleyer, M., Correia, D.L.P., Martin, C.D., Meiri, S., Novosolov, M.,  
801 Pan, Y., Phillips, H.R.P., Purves, D.W., Robinson, A., Simpson, J., Tuck, S.L., Weiher, E.,  
802 White, H.J., Ewers, R.M., Mace, G.M., Scharlemann, J.P.W. & Purvis, A. (2015) Global effects  
803 of land use on local terrestrial biodiversity. *Nature*, 520, 45-50.
- 804 Oatman, E.R., Legner, E.F. & Brooks, R.F. (1964) An ecological study of arthropod populations on apple  
805 in Northeastern Wisconsin: Insect species present. *Journal of Economic Entomology*, 57, 978-  
806 983.
- 807 Obrycki, J.J. & Kring, T.J. (1998) Predaceous Coccinellidae in biological control. *Annual Review of*  
808 *Entomology*, 43, 295-321.
- 809 Oksanen, J., Blanchet, F.G., Kindt, R., Legendre, P., O'Hara, R.B., Simpson, G.L., Solymos, P., Stevens,  
810 M.H.H. & Wagner, H. (2011) vegan: community ecology package. R package version 2.5-6.  
811 <https://CRAN.R-project.org/package=vegan>.
- 812 Ortiz-Martínez, S., Staudacher, K., Baumgartner, V., Traugott, M. & Lavandero, B. (2020) Intraguild  
813 predation is independent of landscape context and does not affect the temporal dynamics of  
814 aphids in cereal fields. *Journal of Pest Science*, 93, 235-249.
- 815 Parker, D.M., Turo, K.J., Delgado de la flor, Y.A. & Gardiner, M.M. (2020) Landscape context  
816 influences the abundance and richness of native lady beetles occupying urban vacant land. *Urban*  
817 *Ecosystems*, 23, 1299-1310.
- 818 Pebesma, E.J. (2018) Simple features for R: Standardized support for spatial vector data. *The R Journal*,  
819 10, 439.
- 820 Pell, J.K., Baverstock, J., Roy, H.E., Ware, R.L. & Majerus, M.E.N. (2008) Intraguild predation involving  
821 *Harmonia axyridis*: a review of current knowledge and future perspectives. *BioControl*, 53, 147-  
822 168.
- 823 Pimentel, D. & Wheeler, A.G., Jr. (1973) Species and diversity of arthropods in the alfalfa community.  
824 *Environmental Entomology*, 2, 659-668.
- 825 Potts, S.G., Biesmeijer, J.C., Kremen, C., Neumann, P., Schweiger, O. & Kunin, W.E. (2010) Global  
826 pollinator declines: trends, impacts and drivers. *Trends in Ecology & Evolution*, 25, 345-353.
- 827 Putman, W.L. (1964) Occurrence and food of some coccinellids (Coleoptera) in Ontario peach orchards.  
828 *The Canadian Entomologist*, 96, 1149-1155.
- 829 R Core Team (2020) R: A language and environment for statistical computing. R Foundation for  
830 Statistical Computing.
- 831 Ricci, C., Ponti, L. & Pires, A. (2005) Migratory flight and pre-diapause feeding of *Coccinella*  
832 *septempunctata* (Coleoptera) adults in agricultural and mountain ecosystems of Central Italy.  
833 *European Journal of Entomology*, 102, 531-538.

- 834 Ries, L., Zipkin, E.F. & Guralnick, R.P. (2019) Tracking trends in monarch abundance over the 20th  
835 century is currently impossible using museum records. *Proceedings of the National Academy of*  
836 *Sciences*, 116, 13745-13748.
- 837 Rocha, A.E., Souza, N.F.E., Bleakley, A.D.L., Burley, C., Mott, L.J., Rue-Glutting, G. & Fellowes,  
838 D.E.M. (2018) Influence of urbanisation and plants on the diversity and abundance of aphids and  
839 their ladybird and hoverfly predators in domestic gardens. *EJE*, 115, 140-149.
- 840 Rondoni, G., Borges, I., Collatz, J., Conti, E., Costamagna, A.C., Dumont, F., Evans, E.W., Grez, A.A.,  
841 Howe, A.G., Lucas, E., Maisonhaute, J.-É., Onofre Soares, A., Zaviezo, T. & Cock, M.J.W.  
842 (2021) Exotic ladybirds for biological control of herbivorous insects – a review. *Entomologia*  
843 *Experimentalis et Applicata*, 169, 6-27.
- 844 Ross, N. (2019) GAMs in R: Interactive Course, <https://noamross.github.io/gams-in-r-course/>.
- 845 Roy, H.E., Adriaens, T., Isaac, N.J.B., Kenis, M., Onkelinx, T., Martin, G.S., Brown, P.M.J., Hautier, L.,  
846 Poland, R., Roy, D.B., Comont, R., Eschen, R., Frost, R., Zindel, R., Van Vlaenderen, J., Nedvěd,  
847 O., Ravn, H.P., Grégoire, J.-C., de Biseau, J.-C. & Maes, D. (2012) Invasive alien predator causes  
848 rapid declines of native European ladybirds. *Diversity and Distributions*, 18, 717-725.
- 849 Roy, H.E., Brown, P.M.J., Adriaens, T., Berkvens, N., Borges, I., Clusella-Trullas, S., Comont, R.F., De  
850 Clercq, P., Eschen, R., Estoup, A., Evans, E.W., Facon, B., Gardiner, M.M., Gil, A., Grez, A.A.,  
851 Guillemaud, T., Haelewaters, D., Herz, A., Honek, A., Howe, A.G., Hui, C., Hutchison, W.D.,  
852 Kenis, M., Koch, R.L., Kulfan, J., Lawson Handley, L., Lombaert, E., Loomans, A., Losey, J.,  
853 Lukashuk, A.O., Maes, D., Magro, A., Murray, K.M., Martin, G.S., Martinkova, Z., Minnaar,  
854 I.A., Nedved, O., Orlova-Bienkowskaja, M.J., Osawa, N., Rabitsch, W., Ravn, H.P., Rondoni, G.,  
855 Rorke, S.L., Ryndevich, S.K., Saethre, M.-G., Sloggett, J.J., Soares, A.O., Stals, R., Tinsley,  
856 M.C., Vandereycken, A., van Wielink, P., Vigišová, S., Zach, P., Zakharov, I.A., Zaviezo, T. &  
857 Zhao, Z. (2016) The harlequin ladybird, *Harmonia axyridis*: Global perspectives on invasion  
858 history and ecology. *Biological Invasions*, 18, 997-1044.
- 859 Rusch, A., Chaplin-Kramer, R., Gardiner, M.M., Hawro, V., Holland, J., Landis, D., Thies, C.,  
860 Tschardtke, T., Weisser, W.W., Winqvist, C., Woltz, M. & Bommarco, R. (2016) Agricultural  
861 landscape simplification reduces natural pest control: A quantitative synthesis. *Agriculture,*  
862 *Ecosystems & Environment*, 221, 198-204.
- 863 Sánchez-Bayo, F. & Wyckhuys, K.A.G. (2019) Worldwide decline of the entomofauna: A review of its  
864 drivers. *Biological Conservation*, 232, 8-27.
- 865 Saunders, M.E., Janes, J.K. & O'Hanlon, J.C. (2020) Moving on from the insect apocalypse narrative:  
866 Engaging with evidence-based insect conservation. *BioScience*, 70, 80-89.
- 867 Schowalter, T.D., Pandey, M., Presley, S.J., Willig, M.R. & Zimmerman, J.K. (2021) Arthropods are not  
868 declining but are responsive to disturbance in the Luquillo Experimental Forest, Puerto Rico.  
869 *Proceedings of the National Academy of Sciences*, 118, e2002556117.
- 870 Schuch, S., Wesche, K. & Schaefer, M. (2012) Long-term decline in the abundance of leafhoppers and  
871 planthoppers (Auchenorrhyncha) in Central European protected dry grasslands. *Biological*  
872 *Conservation*, 149, 75-83.

- 873 Seibold, S., Gossner, M.M., Simons, N.K., Blüthgen, N., Müller, J., Ambarlı, D., Ammer, C., Bauhus, J.,  
874 Fischer, M., Habel, J.C., Linsenmair, K.E., Nauss, T., Penone, C., Prati, D., Schall, P., Schulze,  
875 E.-D., Vogt, J., Wöllauer, S. & Weisser, W.W. (2019) Arthropod decline in grasslands and forests  
876 is associated with landscape-level drivers. *Nature*, 574, 671-674.
- 877 Shaffer, H.B., Fisher, R.N. & Davidson, C. (1998) The role of natural history collections in documenting  
878 species declines. *Trends in Ecology & Evolution*, 13 1, 27-30.
- 879 Shortall, C.R., Moore, A., Smith, E., Hall, M.J., Woïwod, I.P. & Harrington, R. (2009) Long-term  
880 changes in the abundance of flying insects. *Insect Conservation and Diversity*, 2, 251-260.
- 881 Simmons, B.I., Balmford, A., Bladon, A.J., Christie, A.P., De Palma, A., Dicks, L.V., Gallego-Zamorano,  
882 J., Johnston, A., Martin, P.A., Purvis, A., Rocha, R., Wauchope, H.S., Wordley, C.F.R.,  
883 Worthington, T.A. & Finch, T. (2019) Worldwide insect declines: An important message, but  
884 interpret with caution. *Ecology and Evolution*, 9, 3678-3680.
- 885 Sloggett, J.J. (2017) *Harmonia axyridis* (Coleoptera: Coccinellidae): Smelling the rat in native ladybird  
886 declines. *European Journal of Entomology*, 114, 455-461.
- 887 Smith, B.C. (1971) Effects of various factors on the local distribution and density of coccinellid adults on  
888 corn (Coleoptera: Coccinellidae). *The Canadian Entomologist*, 103, 1115-1120.
- 889 Smith, C.A. & Gardiner, M.M. (2013) Biodiversity loss following the introduction of exotic competitors:  
890 Does intraguild predation explain the decline of native lady beetles? *PLoS ONE*, 8, e84448.
- 891 Snyder, W.E. (2009) Coccinellids in diverse communities: Which niche fits? *Biological Control*, 51, 323-  
892 335.
- 893 Snyder, W.E. & Evans, E.W. (2006) Ecological effects of invasive arthropod generalist predators. *Annu.*  
894 *Rev. Ecol. Evol. Syst.*, 37, 95-122.
- 895 Snyder, W.E., Clevenger, G.M. & Eigenbrode, S.D. (2004) Intraguild predation and successful invasion  
896 by introduced ladybird beetles. *Oecologia*, 140, 559-565.
- 897 Sohl, T., Reker, R., Bouchard, M., Sayler, K., Dornbierer, J., Wika, S., Quenzer, R. & Friesz, A. (2016)  
898 Modeled historical land use and land cover for the conterminous United States. *Journal of Land*  
899 *Use Science*, 11, 476-499.
- 900 Sohl, T., Reker, R., Bouchard, M., Sayler, K., Dornbierer, J., Wika, S., Quenzer, R. & Friesz, A. (2018)  
901 Modeled historical land use and land cover for the conterminous United States: 1938-1992: U.S.  
902 Geological Survey data release. <https://doi.org/10.5066/F7KK99RR>.
- 903 Staines, C.L. (2008) Coccinellidae or ladybird beetles (Insecta: Coleoptera) of Plummers Island,  
904 Maryland. *Bulletin of the Biological Society of Washington*, 15, 149-150.
- 905 Staines Jr, C., Rothschild, M. & Trumbule, R. (1990) A survey of the Coccinellidae (Coleoptera)  
906 associated with nursery stock in Maryland. *Proceedings of the Entomological Society of*  
907 *Washington*, 92, 310-313.



- 908 Steffens, W.P. & Lumen, R. (2015) Decline in relative abundance of *Hippodamia convergens*  
909 (Coleoptera: Coccinellidae) in fall shoreline aggregations on western Lake Superior. Great Lakes  
910 Entomologist, 48, 8.
- 911 Suarez, A.V. & Tsutsui, N.D. (2004) The value of museum collections for research and society.  
912 BioScience, 54, 66-74.
- 913 Thomas, A.P., Trotman, J., Wheatley, A., Aebi, A., Zindel, R. & Brown, P.M.J. (2013) Predation of  
914 native coccinellids by the invasive alien *Harmonia axyridis* (Coleoptera: Coccinellidae):  
915 detection in Britain by PCR-based gut analysis. Insect Conservation and Diversity, 6, 20-27.
- 916 Thomas, C.D., Jones, T.H. & Hartley, S.E. (2019) "Insectageddon": A call for more robust data and  
917 rigorous analyses. Global Change Biology, 25, 1891-1892.
- 918 Turnock, W.J., Wise, I.L. & Matheson, F.O. (2003) Abundance of some native coccinellines (Coleoptera:  
919 Coccinellidae) before and after the appearance of *Coccinella septempunctata*. The Canadian  
920 Entomologist, 135, 391-404.
- 921 Vitousek, P.M., Mooney, H.A., Lubchenco, J. & Melillo, J.M. (1997) Human domination of Earth's  
922 ecosystems. Science, 277, 494-499.
- 923 Wagner, D.L. (2020) Insect declines in the anthropocene. Annual Review of Entomology, 65, 457-480.
- 924 Wagner, D.L., Grames, E.M., Forister, M.L., Berenbaum, M.R. & Stopak, D. (2021) Insect decline in the  
925 Anthropocene: Death by a thousand cuts. Proceedings of the National Academy of Sciences, 118,  
926 e2023989118.
- 927 Warren, M.S., Maes, D., van Swaay, C.A.M., Goffart, P., Van Dyck, H., Bourn, N.A.D., Wynhoff, I.,  
928 Hoare, D. & Ellis, S. (2021) The decline of butterflies in Europe: Problems, significance, and  
929 possible solutions. Proceedings of the National Academy of Sciences, 118, e2002551117.
- 930 Weber, D.C. & Lundgren, J.G. (2009) Assessing the trophic ecology of the Coccinellidae: Their roles as  
931 predators and as prey. Biological Control, 51, 199-214.
- 932 Wheeler Jr, A. & Hoebeke, E. (1995) *Coccinella novemnotata* in northeastern North America: Historical  
933 occurrence and current status (Coleoptera: Coccinellidae). Entomological Society of Washington  
934 (USA), 97(3): pp.701-716,
- 935 Wickham, J., Stehman, S.V., Sorenson, D.G., Gass, L. & Dewitz, J.A. (2021) Thematic accuracy  
936 assessment of the NLCD 2016 land cover for the conterminous United States. Remote Sensing of  
937 Environment, 257, 112357.
- 938 Wilcove, D.S., Rothstein, D., Jason, D., Phillips, A. & Losos, E. (1998) Quantifying threats to imperiled  
939 species in the United States. BioScience, 48, 607-615.
- 940 Winker, K. (2004) Natural history museums in a postbiodiversity era. BioScience, 54, 455-459.
- 941 Woltz, M.J. & Landis, D.A. (2014) Coccinellid response to landscape composition and configuration.  
942 Agricultural and Forest Entomology, 16, 341-349.

- 943 Wood, S.N. (2017) Generalized Additive Models: An Introduction with R (2nd edition). Chapman and  
944 Hall/CRC.
- 945 Yang, L.H. & Gratton, C. (2014) Insects as drivers of ecosystem processes. Current Opinion in Insect  
946 Science, 2, 26-32.
- 947 Zaviezo, T., Grez, A.A., Estades, C.F. & Perez, A. (2006) Effects of habitat loss, habitat fragmentation,  
948 and isolation on the density, species richness, and distribution of ladybeetles in manipulated  
949 alfalfa landscapes. Ecological Entomology, 31, 646-656.  
950  
951  
952

**Table 1.** Ohio lady beetle species records from 1900-2018 compiled from 25 institutions across the United States. Data collection focused on native and alien species within the tribe Coccinellini and four additional species (*B. ursina*, *C. stigma*, *H. undulata*, and *P. vigintimaculata*). Lady beetle species were characterized based on their status (native or alien to Ohio, USA) and their primary diet (aphids, scales, or fungi).

| Lady beetle species                           | Records | First Record | Last Record | Status | Primary Diet          |
|-----------------------------------------------|---------|--------------|-------------|--------|-----------------------|
| <i>Brachiacantha ursina</i> (Fabricius)       | 255     | 1902         | 2015        | Native | Aphidoidea, Coccoidea |
| <i>Hyperaspis undulata</i> (Say)              | 61      | 1905         | 2014        | Native | Coccoidea             |
| <i>Chilocorus stigma</i> (Say)                | 111     | 1901         | 2016        | Native | Coccoidea, Aphidoidea |
| <i>Adalia bipunctata</i> (Linnaeus)           | 218     | 1901         | 1996        | Native | Aphidoidea            |
| <i>Anatis labiculata</i> (Say)                | 176     | 1907         | 2012        | Native | Coccoidea, Aphidoidea |
| <i>Anatis mali</i> (Say)                      | 23      | 1932         | 2013        | Native | Coccoidea, Aphidoidea |
| <i>Anisosticta bitriangularis</i> (Say)       | 16      | 1923         | 2012        | Native | Aphidoidea, Pollen    |
| <i>Coccinella novemnotata</i> Herbst          | 169     | 1901         | 1985        | Native | Aphidoidea            |
| <i>Coccinella septempunctata</i> (Linnaeus)   | 102     | 1978         | 2017        | Alien  | Aphidoidea            |
| <i>Coccinella transversoguttata</i> Mulsant   | 51      | 1921         | 1986        | Native | Aphidoidea            |
| <i>Coccinella trifasciata</i> Linnaeus        | 19      | 1911         | 1971        | Native | Aphidoidea            |
| <i>Coccinella undecimpunctata</i> Linnaeus    | 1       | 1953         | 1953        | Alien  | Aphidoidea            |
| <i>Coleomegilla maculata</i> (Degeer)         | 690     | 1901         | 2018        | Native | Aphidoidea, Pollen    |
| <i>Cycloneda munda</i> (Say)                  | 302     | 1901         | 2017        | Native | Aphidoidea            |
| <i>Harmonia axyridis</i> (Pallas)             | 470     | 1993         | 2018        | Alien  | Aphidoidea            |
| <i>Hippodamia convergens</i> Guerin           | 400     | 1903         | 2015        | Native | Aphidoidea            |
| <i>Hippodamia glacialis</i> (Fabricius)       | 39      | 1905         | 2016        | Native | Aphidoidea            |
| <i>Hippodamia parenthesis</i> (Say)           | 353     | 1900         | 2017        | Native | Aphidoidea            |
| <i>Hippodamia quindecimmaculata</i> Mulsant   | 3       | 1905         | 1935        | Native | Aphidoidea            |
| <i>Hippodamia tredecimpunctata</i> (Linnaeus) | 155     | 1903         | 2014        | Native | Aphidoidea            |
| <i>Hippodamia variegata</i> (Goeze)           | 10      | 2000         | 2016        | Alien  | Aphidoidea            |
| <i>Mulsantina luteodorsa</i> J. Chapin        | 1       | 2008         | 2008        | Native | Aphidoidea            |
| <i>Mulsantina picta</i> (Randall)             | 51      | 1924         | 2015        | Native | Aphidoidea            |

|                                                 |     |      |      |        |                        |
|-------------------------------------------------|-----|------|------|--------|------------------------|
| <i>Myzia pullata</i> (Say)                      | 30  | 1934 | 2012 | Native | Aphidoidea             |
| <i>Neoharmonia venusta</i> (Melsheimer)         | 119 | 1902 | 2012 | Native | Coccoidea              |
| <i>Olla v-nigrum</i> (Mulsant)                  | 21  | 1932 | 2004 | Native | Aphidoidea, Psylloidea |
| <i>Propylea quatuordecimpunctata</i> (Linnaeus) | 27  | 2003 | 2016 | Alien  | Aphidoidea             |
| <i>Psyllobora vigintimaculata</i> (Say)         | 321 | 1902 | 2016 | Native | Fungi (Erisyphaceae)   |

**Figure 1.** The study area is congruent with the state of Ohio; inset shows the relative location of Ohio in the conterminous United States. Ohio counties within the four geographic regions of the state are color-coded, Lake Erie Glaciated Plateau (LEGP; top right), Appalachian Plateau (AP; bottom right), Indiana-Ohio Till Plain (IOTP; bottom left), and Western Lake Erie Basin (WLEB; top left).

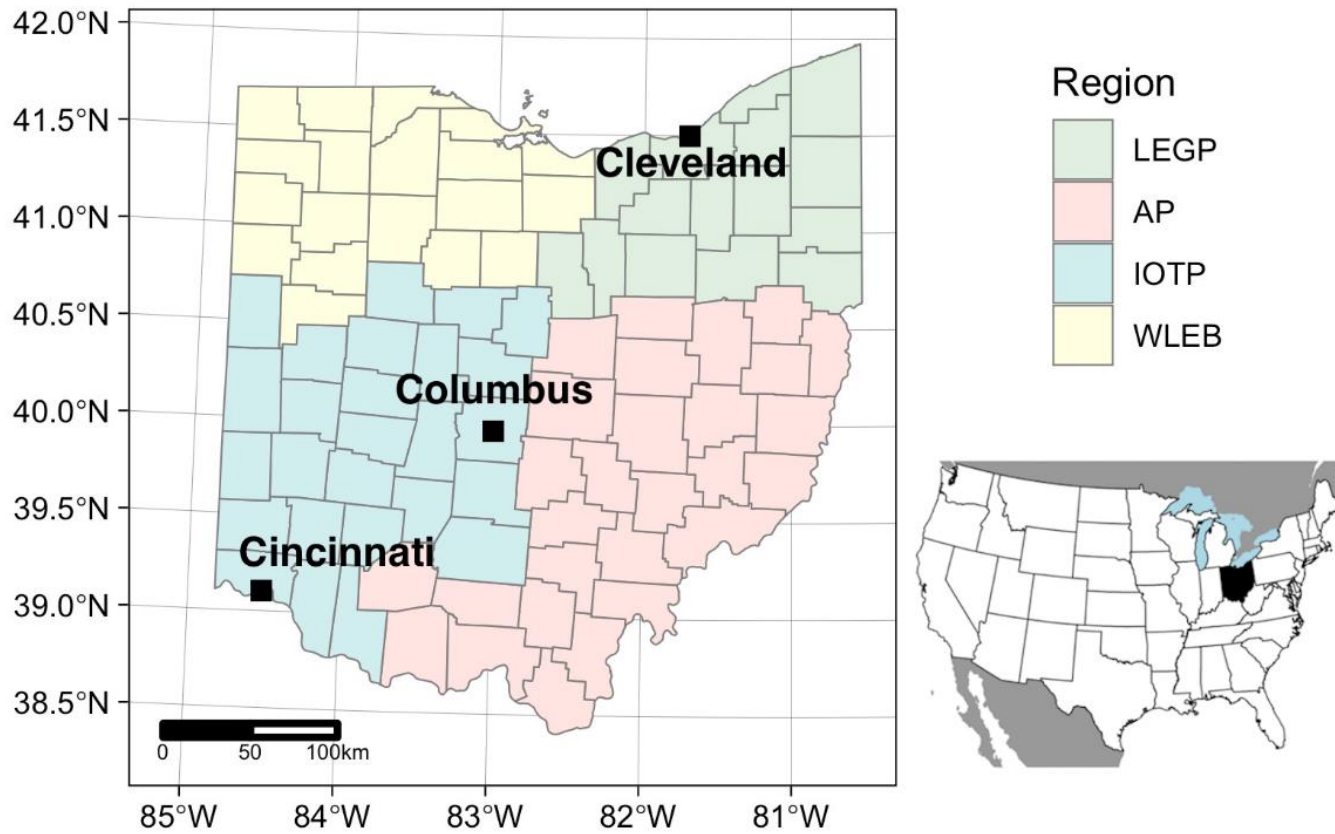

**Figure 2.** Spatial extent of agriculture (row A), developed land (row B), and forest (row C) in Ohio for each time period (columns).

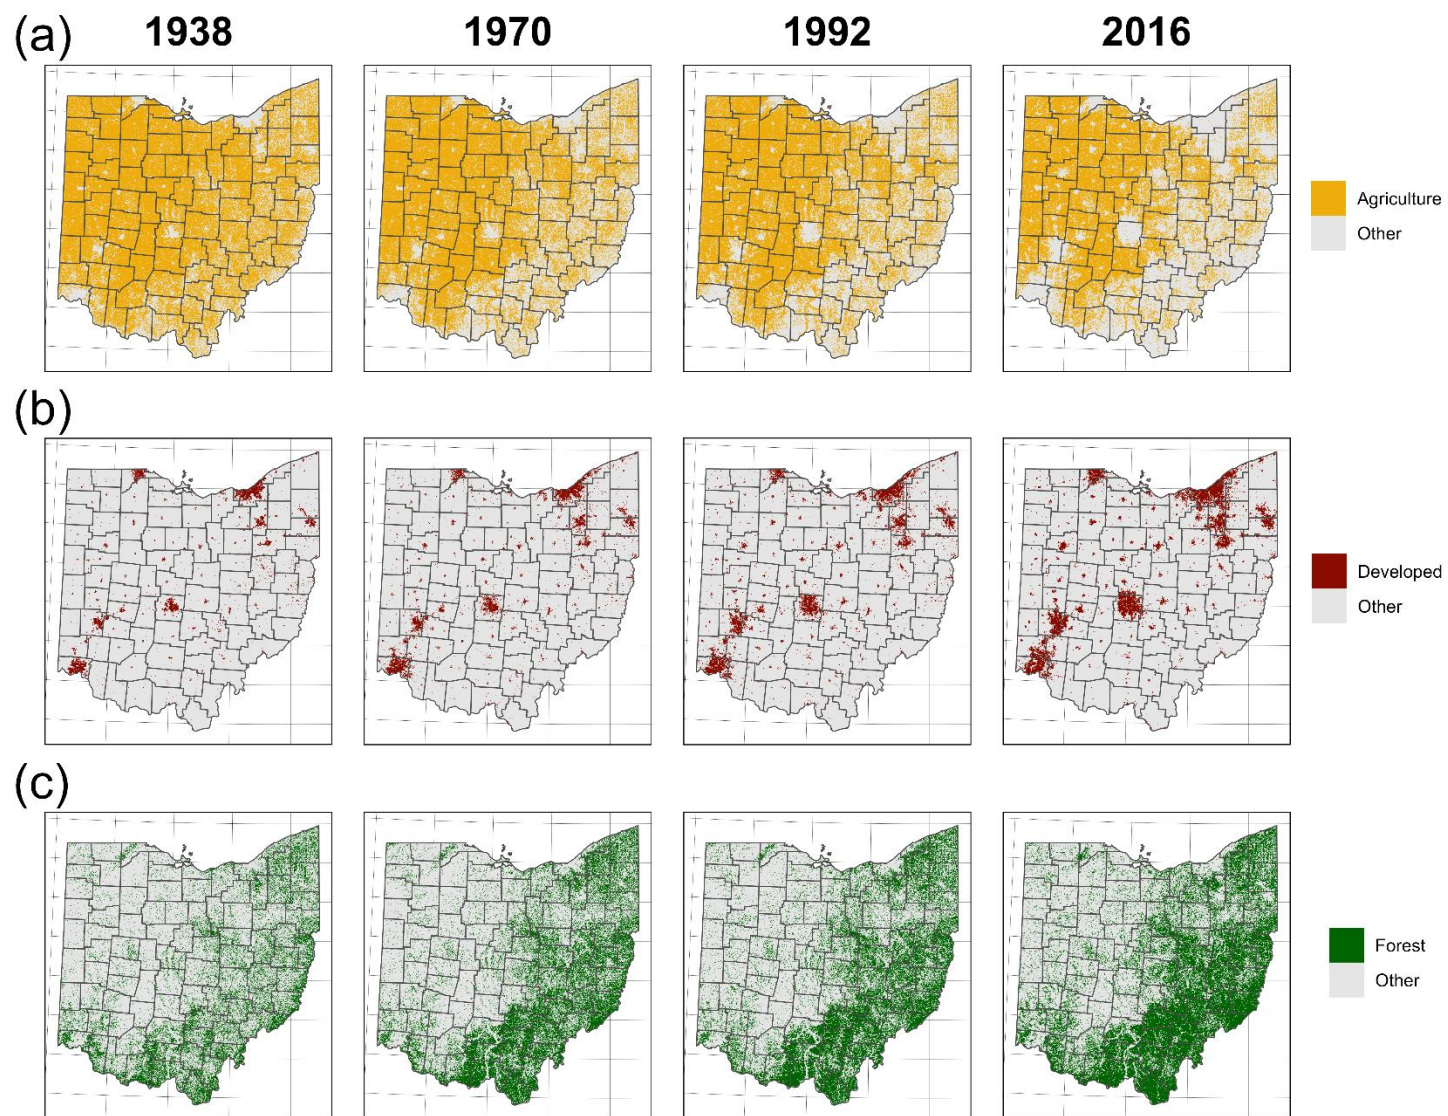

**Figure 3.** Number of collections (A) and proportion of collections (B) of native and alien lady beetle records from Ohio by decade from 1900 to 2018.

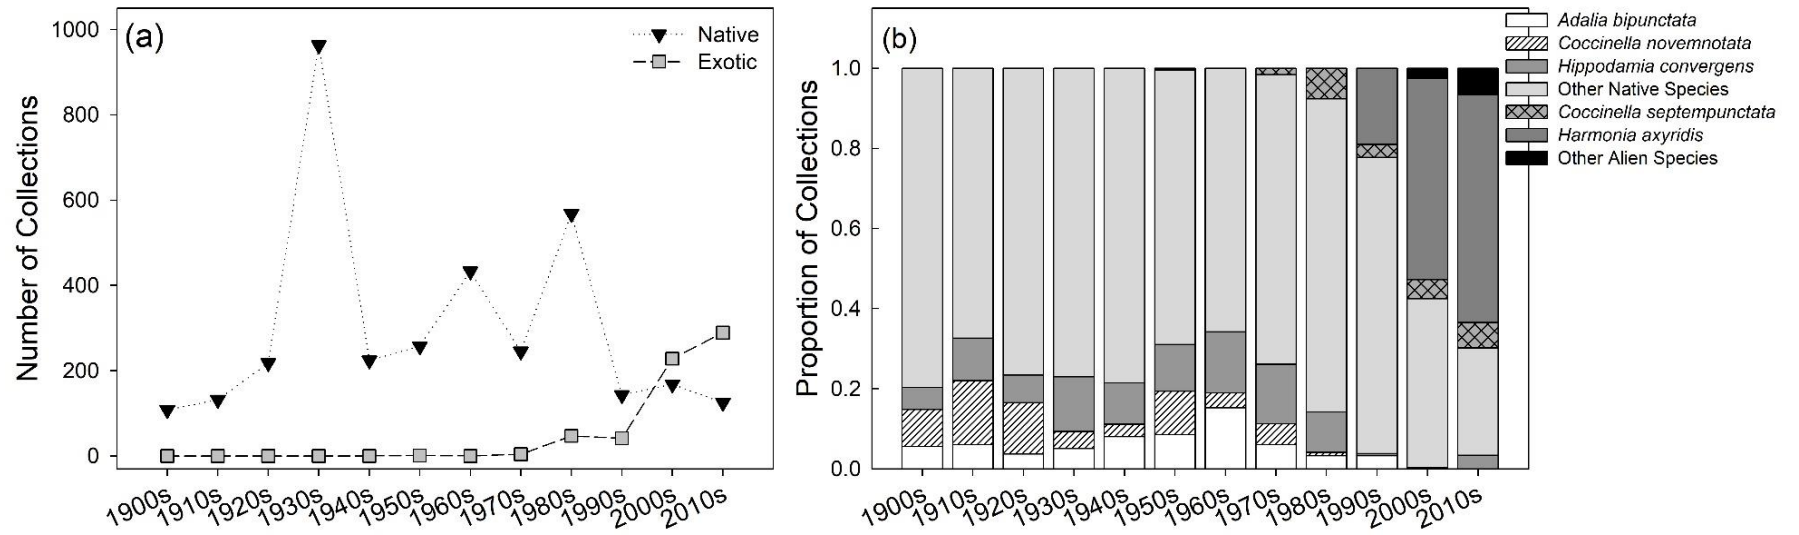

**Figure 4.** Descriptive patterns of taxonomic beta-diversity across decades for all lady beetle species (A) and aphidophagous lady beetle species (B) collected in Ohio. Total Sorensen dissimilarity ( $\beta_{\text{SOR}}$ ) among decades was partitioned into two additive components: turnover ( $\beta_{\text{SIM}}$ ; reflects species replacement) and nestedness ( $\beta_{\text{SNE}}$ ; reflects species loss or gain). Therefore,  $\beta_{\text{SOR}} = \beta_{\text{SIM}} + \beta_{\text{SNE}}$ .

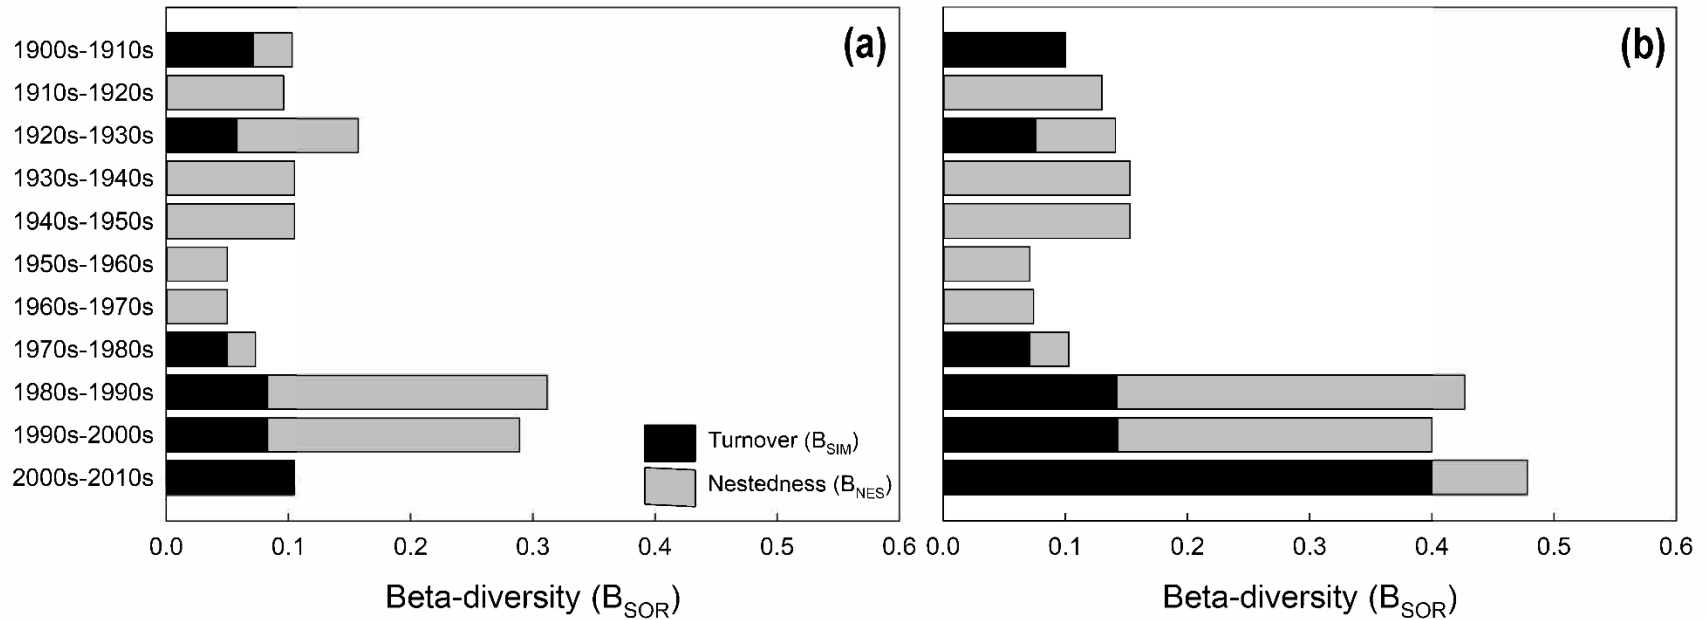



**Figure 5.** Matrix of partial GAM predictions of responses for five key native species to spatiotemporal, invasion, and landscape parameters. Negative binomial generalized additive models used Ohio museum collections, 1930-2018 data on lady beetle captures and were adjusted for sampling effort. Predictions were constructed by generating data that held all other parameters constant and varying the parameter of interest, and then substituting these data into the best-fit model determined by model selection (Appendix 2, Table 1). Solid lines, shading represent 95% confidence intervals.

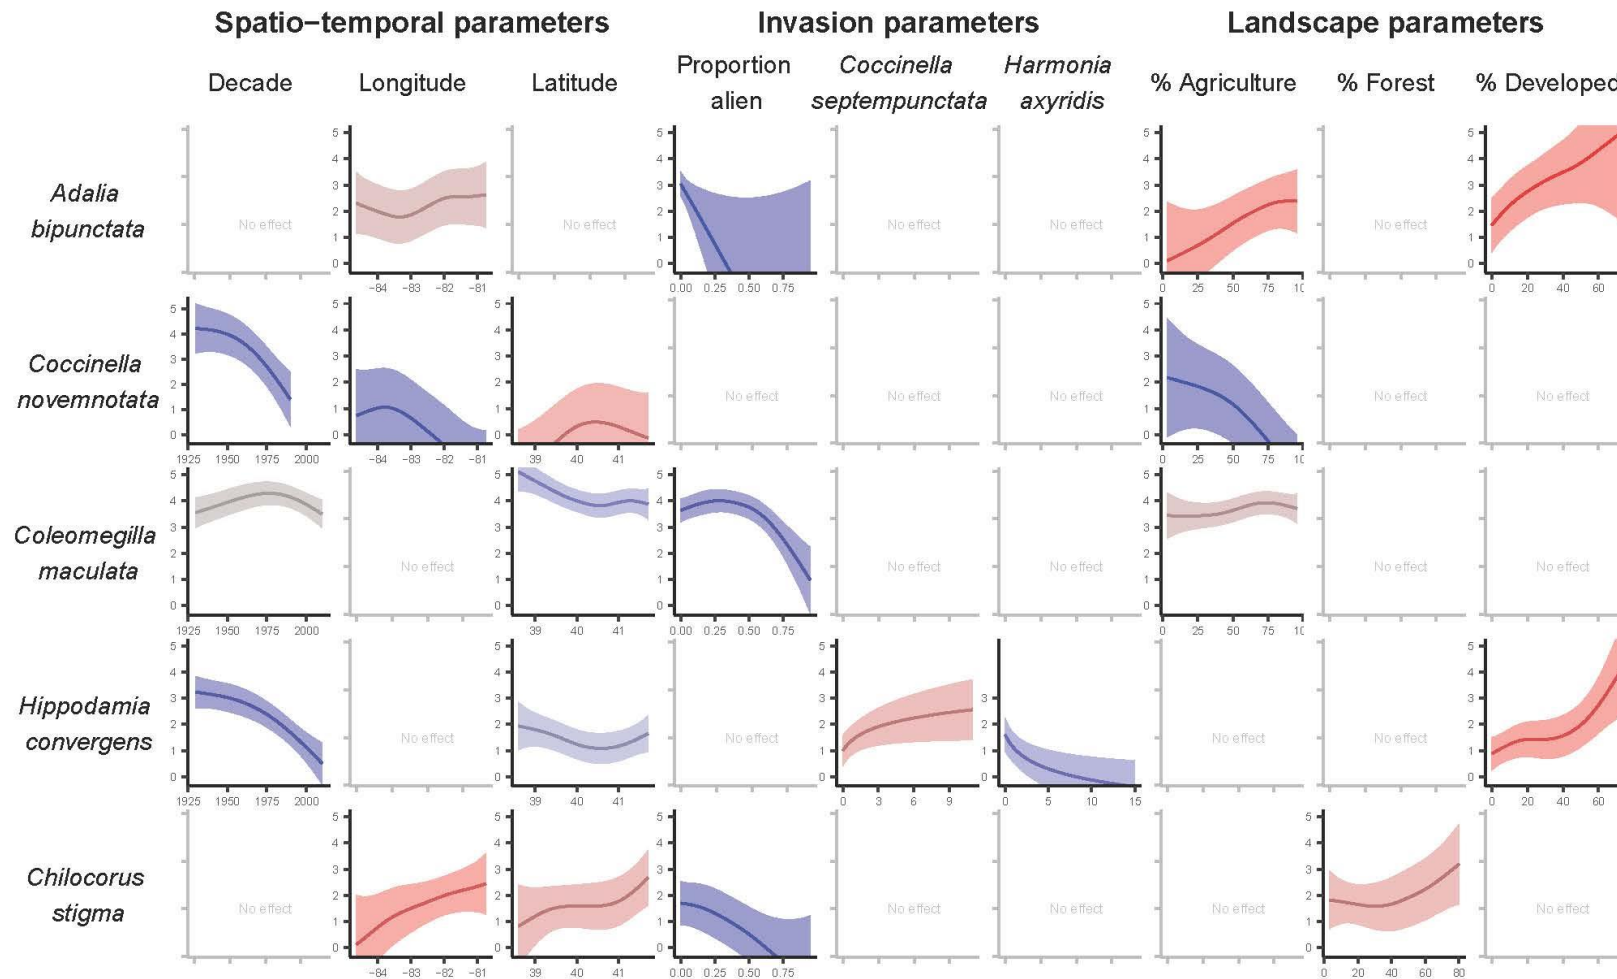

Source: https://www.biorxiv.org/content/10.1101/2022.04.21.489069v1.full.pdf
